# Supplementary material
Source: publisher site journal article supplement (https://www.dovepress.com/get_supplementary_file.php?f=496130.docx)
Supplement: Supplementary file 1 [file get_supplementary_file.php]

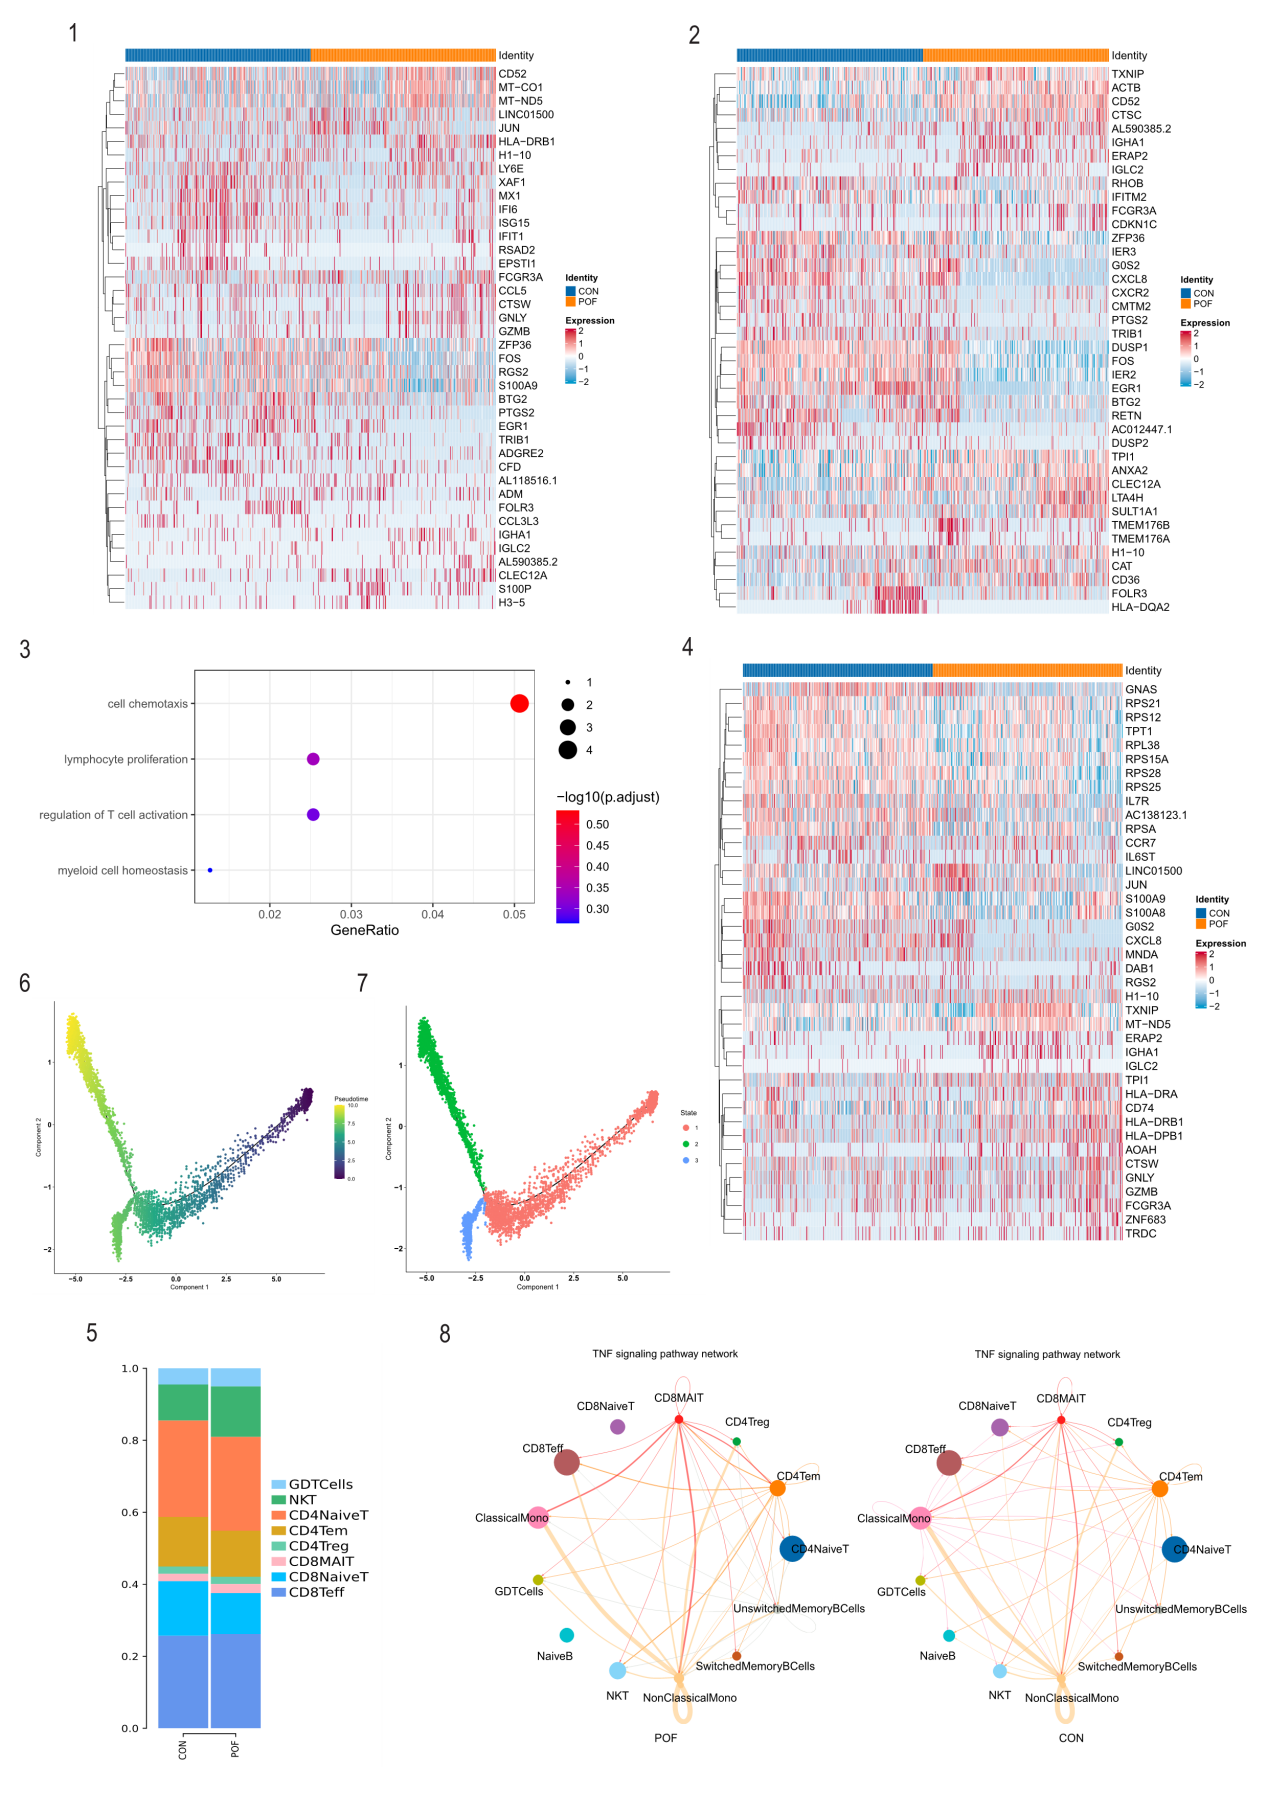

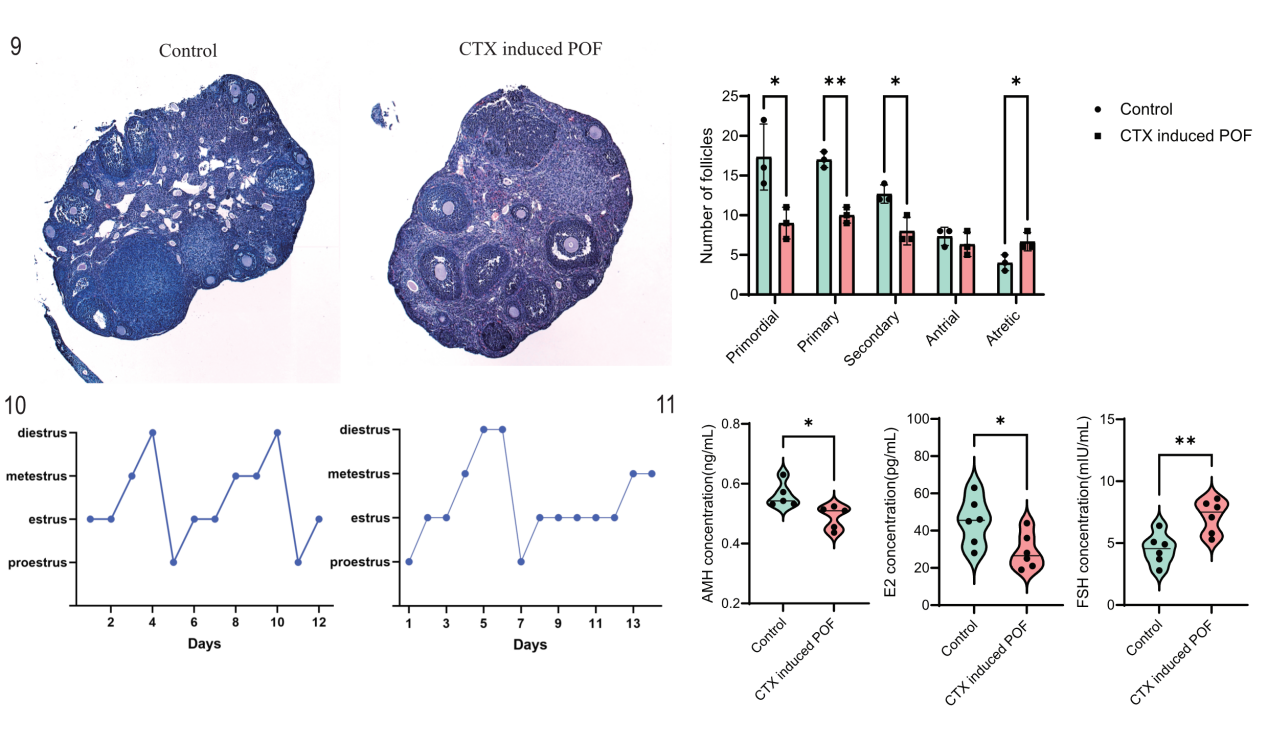


**Supplementary Figure** (**1**) Differential gene heat map of all cells in both groups. (**2**) The heatmap of upregulation genes associated with the inflammatory phenotype in the POF group. (**3**) Gene Ontology (GO) functional enrichment bubble plot of non-canonical monocytes. (**4**) Heatmap of differential genes between two groups of T cells. (**5**) Histogram of the proportion of T cell composition between the two groups. (**6, 7**) Pseudotime analysis on the CD8 T cell population. (**8**) The interaction network diagram of TNF signaling pathway in two groups. (**9**) H&E staining displaying ovarian morphology and columns representing the proportion of follicles at various stages of development between the control group and the CTX induced POF model group(N=6). (**10**) Comparison of estrus cycles between the control group and the CTX induced POF model group(N=6). (**11**) Two groups of AMH E2 and FSH levels(N=6). **P*<0.05. ***P*<0.01.

**Supplementary Table 1** All fluorochrome-labeled antibodies used in flow cytometry.

| Catalog number | Fluorescence channel | antibody | titre |
| --- | --- | --- | --- |
| 340133 | FITC | CD4 | 200 |
| 566699 | PE-CF594 | CD3 | 200 |
| 552771 | PerCP-Cy5.5 | B220 | 200 |
| 340942 | AF700 | CD45 | 200 |
| 742637 | BV421 | CD11b | 200 |
| 569615 | BV510 | F4/80 | 200 |
| 753753 | BV650 | CD8 | 200 |

**Supplementary Table 2** Comparison of differentially expressed genes in all cells of two groups.

| gene_id | avg_logFC | p_val | p_val_adj | POF | CON |
| --- | --- | --- | --- | --- | --- |
| HBB | 4.962768 | 0 | 0 | 1.1032021 | 0.028693544 |
| HBA2 | 4.3434143 | 0 | 0 | 0.7852741 | 0.016580753 |
| HBA1 | 3.9352698 | 0 | 0 | 0.64043427 | 0.02411631 |
| S100P | 1.4050287 | 0 | 0 | 0.47729626 | 0.09730799 |
| CLEC12A | 1.1073756 | 0 | 0 | 0.4734132 | 0.12023796 |
| IGLC2 | 0.7515999 | 5.02E-111 | 4.21E-109 | 0.25585085 | 0.14147082 |
| IGHA1 | 0.74848783 | 4.60E-173 | 9.37E-171 | 0.25963062 | 0.1346667 |
| GZMB | 0.71084934 | 4.32E-66 | 1.68E-64 | 0.47426385 | 0.3208577 |
| GNLY | 0.6007155 | 2.14E-90 | 1.32E-88 | 0.77988726 | 0.5659202 |
| JUN | 0.55708516 | 1.04E-14 | 1.02E-13 | 0.86924136 | 0.7609567 |
| HLA-DRB1 | 0.5373767 | 8.47E-72 | 3.63E-70 | 0.8363275 | 0.64474064 |
| MT-ND5 | 0.5053461 | 1.82E-182 | 4.14E-180 | 1.9085821 | 1.6225156 |
| ADM | 0.43076527 | 2.45E-13 | 2.23E-12 | 0.40162176 | 0.31778538 |
| FCGR3A | 0.42338252 | 6.30E-46 | 1.61E-44 | 0.90745074 | 0.7687877 |
| H3-5 | 0.42271757 | 6.39E-82 | 3.42E-80 | 0.19918188 | 0.10107307 |
| CCL5 | 0.42153654 | 8.07E-41 | 1.82E-39 | 0.9756114 | 0.79904765 |
| CTSW | 0.41935146 | 1.02E-32 | 1.83E-31 | 0.4422259 | 0.3390744 |
| MT-CO1 | 0.39928257 | 1.98E-104 | 1.51E-102 | 2.9634638 | 2.7204337 |
| CD52 | 0.3922336 | 6.90E-98 | 4.72E-96 | 1.8314693 | 1.5526143 |
| H1-10 | 0.3904919 | 3.11E-64 | 1.16E-62 | 0.50958514 | 0.38053995 |
| AL590385.2 | 0.38477087 | 1.90E-157 | 3.10E-155 | 0.19976711 | 0.092404716 |
| AL118516.1 | 0.37683085 | 1.44E-18 | 1.66E-17 | 0.27865693 | 0.20610034 |
| LINC01500 | 0.37033963 | 3.86E-20 | 4.66E-19 | 0.5987395 | 0.50999177 |
| MT-ND4 | 0.35550344 | 3.63E-171 | 7.06E-169 | 2.7637904 | 2.5100105 |
| LTA4H | 0.3527947 | 4.62E-41 | 1.05E-39 | 0.39164335 | 0.29246053 |
| RBM8A | 0.33899453 | 1.00E-54 | 3.06E-53 | 0.70396143 | 0.5748376 |
| USP10 | 0.3380122 | 0.001541509 | 0.005219461 | 0.5972317 | 0.5365815 |
| CD74 | 0.33794692 | 5.84E-28 | 9.05E-27 | 2.12143 | 1.9996848 |
| MARCHF1 | 0.33708608 | 4.18E-30 | 6.99E-29 | 0.2846225 | 0.20320557 |
| TPI1 | 0.33055937 | 1.03E-65 | 3.96E-64 | 0.79363835 | 0.6539703 |
| UBB | 0.3295173 | 1.73E-68 | 6.94E-67 | 1.3671596 | 1.220306 |
| TSPYL2 | 0.32051504 | 2.80E-18 | 3.20E-17 | 0.3004438 | 0.23253013 |
| MT-ATP6 | 0.31970835 | 1.06E-155 | 1.71E-153 | 2.5045319 | 2.2419147 |
| LTB | 0.31812936 | 2.80E-27 | 4.23E-26 | 1.2185992 | 1.111533 |
| HLA-DPB1 | 0.30736673 | 1.31E-65 | 5.03E-64 | 0.65973926 | 0.5171482 |
| MT-CO2 | 0.30628806 | 1.99E-125 | 2.06E-123 | 2.7005029 | 2.4951508 |
| MT-CO3 | 0.3027691 | 2.56E-76 | 1.18E-74 | 2.801964 | 2.668552 |
| PDIA3 | 0.3004722 | 2.01E-58 | 6.65E-57 | 0.59181917 | 0.46891633 |
| ERAP2 | 0.2978743 | 2.12E-177 | 4.53E-175 | 0.17198479 | 0.07599709 |
| MT-CYB | 0.29462057 | 3.93E-78 | 1.91E-76 | 2.5059836 | 2.331739 |
| PFN1 | 0.29446074 | 2.91E-231 | 1.09E-228 | 2.7201402 | 2.539902 |
| SH2D2A | 0.2906806 | 2.18E-40 | 4.88E-39 | 0.20675187 | 0.13949013 |
| KLRD1 | 0.28878802 | 6.16E-47 | 1.61E-45 | 0.35259956 | 0.2620341 |
| GADD45B | 0.2854322 | 4.20E-09 | 2.93E-08 | 0.47050118 | 0.40917525 |
| PTMA | 0.28522837 | 1.79E-89 | 1.09E-87 | 2.0159478 | 1.7815794 |
| PRF1 | 0.27761963 | 4.50E-40 | 9.97E-39 | 0.48164955 | 0.3783335 |
| ANXA2 | 0.27407795 | 1.13E-31 | 1.97E-30 | 0.5287583 | 0.43412465 |
| CD99 | 0.2670952 | 1.98E-33 | 3.64E-32 | 0.5893202 | 0.489523 |
| KLRB1 | 0.26584148 | 2.23E-45 | 5.65E-44 | 0.29497263 | 0.21504779 |
| CST7 | 0.2653696 | 4.47E-24 | 6.14E-23 | 0.7793856 | 0.67133915 |
| NKG7 | 0.26194033 | 1.14E-22 | 1.50E-21 | 0.86892027 | 0.7445096 |
| H2BC21 | 0.25920257 | 4.08E-14 | 3.90E-13 | 0.22346365 | 0.17015335 |
| DDX5 | 0.25749922 | 1.01E-127 | 1.08E-125 | 2.286063 | 2.183264 |
| MFSD14B | 0.25642624 | 1.93E-31 | 3.34E-30 | 0.21899441 | 0.15545164 |
| ADGRG1 | 0.25581425 | 1.32E-36 | 2.63E-35 | 0.2214706 | 0.15744959 |
| S1PR5 | 0.25369832 | 5.25E-39 | 1.12E-37 | 0.22388415 | 0.15828393 |
| PCBP2 | 0.25185898 | 2.77E-38 | 5.79E-37 | 0.96073246 | 0.8644807 |
| H3-3B | 0.25009832 | 2.79E-51 | 8.05E-50 | 2.8283827 | 2.735809 |
| WDFY4 | -0.25006747 | 2.94E-121 | 2.78E-119 | 0.12704453 | 0.21720013 |
| RPS12 | -0.25134578 | 1.06E-30 | 1.80E-29 | 1.3799615 | 1.5171049 |
| RPS15A | -0.25195947 | 6.70E-46 | 1.71E-44 | 1.1520549 | 1.2997512 |
| NOTCH1 | -0.2524422 | 8.80E-199 | 2.38E-196 | 0.38699195 | 0.56509966 |
| AC012368.1 | -0.25369805 | 1.29E-163 | 2.34E-161 | 0.29626983 | 0.4415342 |
| AC138123.1 | -0.25403455 | 3.83E-115 | 3.39E-113 | 0.50707465 | 0.6612459 |
| SLC43A2 | -0.25414002 | 1.76E-172 | 3.56E-170 | 0.4102754 | 0.5818623 |
| PYCARD | -0.25501633 | 6.48E-161 | 1.12E-158 | 0.7528245 | 0.9732198 |
| TMEM123 | -0.25529933 | 1.76E-110 | 1.46E-108 | 0.44033927 | 0.578576 |
| ADAR | -0.2580311 | 1.34E-141 | 1.74E-139 | 0.5785506 | 0.7580622 |
| CYP4F3 | -0.2586462 | 8.63E-172 | 1.71E-169 | 0.32500315 | 0.4816033 |
| MARCKS | -0.25864926 | 2.22E-119 | 2.05E-117 | 0.4313614 | 0.58535635 |
| IFI16 | -0.2586655 | 3.27E-124 | 3.28E-122 | 0.80174375 | 0.9993156 |
| GNAS | -0.25928104 | 4.59E-227 | 1.58E-224 | 0.9104762 | 1.1804029 |
| NINJ1 | -0.26135933 | 8.39E-179 | 1.83E-176 | 0.8269057 | 1.0710773 |
| MICAL2 | -0.26270992 | 9.43E-123 | 9.17E-121 | 0.16631237 | 0.2674109 |
| TLR2 | -0.2646581 | 1.42E-163 | 2.56E-161 | 0.4504351 | 0.6278529 |
| ITPK1 | -0.2655059 | 2.30E-168 | 4.34E-166 | 0.34590444 | 0.50367904 |
| DOCK5 | -0.26614097 | 2.55E-212 | 7.46E-210 | 0.58735347 | 0.8171862 |
| SMCHD1 | -0.26660922 | 5.23E-205 | 1.47E-202 | 1.3906759 | 1.7039254 |
| KDM6B | -0.2674194 | 1.02E-213 | 3.02E-211 | 0.6716326 | 0.9140368 |
| ARAP1 | -0.26760644 | 1.40E-185 | 3.32E-183 | 1.1177988 | 1.3884327 |
| CXCL8 | -0.26818183 | 0 | 0 | 1.5162764 | 2.189503 |
| GBP5 | -0.26840118 | 1.15E-95 | 7.71E-94 | 0.47219723 | 0.61574304 |
| STK24 | -0.26922184 | 8.03E-139 | 9.99E-137 | 0.30933285 | 0.44433743 |
| CSRNP1 | -0.27081615 | 1.15E-283 | 5.84E-281 | 0.30395243 | 0.49181888 |
| HLA-B | -0.2776842 | 0 | 0 | 3.7512765 | 3.9956641 |
| EIF2AK2 | -0.27815792 | 1.24E-82 | 6.75E-81 | 0.2255192 | 0.32591262 |
| DDX60 | -0.28120425 | 2.08E-83 | 1.16E-81 | 0.13148008 | 0.21397328 |
| CHI3L1 | -0.28234455 | 7.57E-190 | 1.93E-187 | 0.17880003 | 0.309703 |
| MGAM | -0.28299493 | 4.08E-173 | 8.38E-171 | 0.43207684 | 0.6150188 |
| SAMD9 | -0.29093674 | 1.00E-115 | 9.01E-114 | 0.39970744 | 0.5455486 |
| UBALD2 | -0.29181722 | 9.78E-265 | 4.36E-262 | 0.76529557 | 1.0410506 |
| OAS1 | -0.293243 | 2.72E-66 | 1.06E-64 | 0.14190558 | 0.22048442 |
| RESF1 | -0.2974883 | 8.36E-215 | 2.52E-212 | 1.0877272 | 1.3827908 |
| CSF2RB | -0.29955465 | 3.39E-249 | 1.48E-246 | 0.82122976 | 1.1173599 |
| DUSP6 | -0.30053797 | 8.73E-150 | 1.30E-147 | 0.36052307 | 0.52053684 |
| PREX1 | -0.30280218 | 3.49E-242 | 1.38E-239 | 1.0152718 | 1.3141841 |
| SEMA4D | -0.3029266 | 2.67E-235 | 1.04E-232 | 0.56623054 | 0.79524916 |
| HLA-F | -0.30380186 | 4.17E-248 | 1.75E-245 | 0.9465489 | 1.2328693 |
| SIGLEC10 | -0.30453023 | 1.04E-107 | 8.43E-106 | 0.22207002 | 0.33724964 |
| TNFAIP2 | -0.30977166 | 3.96E-227 | 1.39E-224 | 1.0113103 | 1.3223662 |
| PELI1 | -0.31242463 | 1.62E-224 | 5.42E-222 | 0.5146431 | 0.7414114 |
| RHOB | -0.3130248 | 4.22E-180 | 9.41E-178 | 0.26683676 | 0.42008454 |
| ECE1 | -0.31577873 | 2.61E-177 | 5.53E-175 | 0.42020544 | 0.6032127 |
| MX2 | -0.3166739 | 1.46E-184 | 3.40E-182 | 0.6360436 | 0.86247075 |
| AL034397.3 | -0.3177363 | 1.07E-185 | 2.56E-183 | 0.3587203 | 0.53505355 |
| LIMK2 | -0.31954208 | 6.28E-232 | 2.40E-229 | 0.6777586 | 0.9432609 |
| SAMD9L | -0.32051453 | 3.73E-131 | 4.15E-129 | 0.31072187 | 0.45148736 |
| CTDSP2 | -0.32125348 | 2.09E-223 | 6.79E-221 | 0.33167636 | 0.5102095 |
| LRRK2 | -0.32141516 | 1.43E-248 | 6.13E-246 | 0.85256284 | 1.1535612 |
| DDX58 | -0.32576227 | 4.24E-124 | 4.24E-122 | 0.31508547 | 0.45536318 |
| SLA | -0.32992113 | 1.41E-277 | 6.84E-275 | 0.5974869 | 0.85930485 |
| RPS28 | -0.3334187 | 5.51E-62 | 1.95E-60 | 1.1568415 | 1.3260269 |
| TRIM22 | -0.34246546 | 1.72E-148 | 2.49E-146 | 0.5593612 | 0.7492112 |
| CXCR4 | -0.3454256 | 3.23E-172 | 6.47E-170 | 0.5674979 | 0.7771349 |
| PSMB9 | -0.34638327 | 9.26E-273 | 4.40E-270 | 1.1223167 | 1.446902 |
| ZCCHC2 | -0.34981415 | 2.77E-199 | 7.59E-197 | 0.14442821 | 0.27292338 |
| PPIF | -0.3519211 | 1.31E-226 | 4.45E-224 | 0.22690512 | 0.38641027 |
| IL7R | -0.35386923 | 7.49E-37 | 1.51E-35 | 0.36885178 | 0.469256 |
| TMEM164 | -0.35390633 | 8.75E-220 | 2.79E-217 | 0.18434714 | 0.33267123 |
| PI3 | -0.35616872 | 9.44E-96 | 6.33E-94 | 0.17944922 | 0.27820566 |
| ITM2B | -0.3564299 | 0 | 0 | 2.7276812 | 3.0722065 |
| CD55 | -0.35791948 | 3.11E-242 | 1.26E-239 | 0.7718257 | 1.049435 |
| TPT1 | -0.35868052 | 4.27E-284 | 2.23E-281 | 1.9636313 | 2.3263013 |
| CD14 | -0.35966018 | 3.55E-186 | 8.63E-184 | 0.59830976 | 0.8406829 |
| IFIT2 | -0.36580685 | 3.20E-164 | 5.86E-162 | 0.67659867 | 0.9102745 |
| RPL38 | -0.38094932 | 1.28E-127 | 1.35E-125 | 1.2946227 | 1.5449436 |
| RNF213 | -0.38440505 | 3.23E-190 | 8.33E-188 | 0.88269615 | 1.1412313 |
| U62317.4 | -0.39159888 | 0 | 0 | 0.26015168 | 0.46742097 |
| GBP1 | -0.39175192 | 2.94E-162 | 5.16E-160 | 0.34816563 | 0.52150947 |
| IER3 | -0.39382556 | 0 | 0 | 0.5194699 | 0.81234974 |
| IFI44 | -0.3955281 | 6.23E-150 | 9.32E-148 | 0.11428971 | 0.22615916 |
| PARP14 | -0.39688012 | 5.66E-168 | 1.06E-165 | 0.3756372 | 0.55611914 |
| RGS18 | -0.4117612 | 1.19E-302 | 6.55E-300 | 0.42669657 | 0.6768369 |
| PADI2 | -0.4161898 | 0 | 0 | 0.26170677 | 0.47212476 |
| AC010894.3 | -0.42648822 | 0 | 0 | 1.7738653 | 2.1556792 |
| S100A12 | -0.42924276 | 2.49E-229 | 9.02E-227 | 0.6993591 | 0.9965515 |
| TIMP1 | -0.43356478 | 3.87E-212 | 1.12E-209 | 0.38243857 | 0.59155244 |
| CCR1 | -0.4363787 | 1.84E-266 | 8.56E-264 | 0.20030425 | 0.37675112 |
| OAS3 | -0.43789375 | 3.34E-170 | 6.37E-168 | 0.10199371 | 0.22145861 |
| LYZ | -0.44284615 | 2.42E-292 | 1.29E-289 | 1.2893926 | 1.6924615 |
| CEBPD | -0.44301993 | 0 | 0 | 1.1484717 | 1.5396029 |
| GIMAP4 | -0.4437791 | 0 | 0 | 0.9928907 | 1.3890009 |
| CXCL1 | -0.44468758 | 7.07E-215 | 2.16E-212 | 0.13417903 | 0.26920357 |
| IFIT3 | -0.45385635 | 2.05E-247 | 8.43E-245 | 0.5582707 | 0.8350499 |
| H3-3A | -0.4550519 | 0 | 0 | 0.42163146 | 0.73054546 |
| HLA-A | -0.4555954 | 0 | 0 | 2.6222413 | 3.0481622 |
| CLEC4E | -0.4669719 | 0 | 0 | 0.60272384 | 0.95149773 |
| HERC5 | -0.47318935 | 3.99E-160 | 6.66E-158 | 0.16243146 | 0.30050865 |
| CMTM2 | -0.48118073 | 0 | 0 | 1.1160145 | 1.56655 |
| CD93 | -0.4909009 | 0 | 0 | 0.17950678 | 0.3758519 |
| DUSP1 | -0.4988535 | 0 | 0 | 2.3005571 | 2.8889527 |
| CCL4L2 | -0.50446665 | 2.80E-80 | 1.44E-78 | 0.14353192 | 0.23630005 |
| RSAD2 | -0.5741378 | 1.22E-223 | 4.02E-221 | 0.094045356 | 0.2362253 |
| XAF1 | -0.5807885 | 0 | 0 | 0.48269778 | 0.771415 |
| EPSTI1 | -0.5831952 | 1.21E-265 | 5.50E-263 | 0.1683057 | 0.35315645 |
| ZFP36 | -0.5858234 | 0 | 0 | 1.4834232 | 1.9853778 |
| S100A9 | -0.5864392 | 0 | 0 | 3.6916459 | 4.3787513 |
| LY6E | -0.59170055 | 3.27E-183 | 7.51E-181 | 0.5474609 | 0.78687024 |
| BTG2 | -0.61064494 | 0 | 0 | 0.7233262 | 1.1531656 |
| IFIT1 | -0.6131949 | 0 | 0 | 0.21288504 | 0.43993792 |
| CCL3L3 | -0.6440895 | 3.48E-279 | 1.73E-276 | 0.10796945 | 0.26303998 |
| TRIB1 | -0.66651237 | 0 | 0 | 0.28691456 | 0.6375171 |
| ADGRE2 | -0.68629265 | 0 | 0 | 0.29294255 | 0.61339295 |
| MX1 | -0.71069384 | 0 | 0 | 0.31596372 | 0.6035414 |
| RGS2 | -0.72578025 | 0 | 0 | 1.5251969 | 2.1466813 |
| IFI6 | -0.754573 | 0 | 0 | 0.39862952 | 0.74164486 |
| FOS | -0.8117065 | 0 | 0 | 1.7738315 | 2.5002453 |
| CFD | -0.81776375 | 0 | 0 | 0.2424374 | 0.5923057 |
| FOLR3 | -0.85760987 | 0 | 0 | 0.109527946 | 0.34169468 |
| ISG15 | -0.88812757 | 0 | 0 | 0.45815682 | 0.7877415 |
| PTGS2 | -0.97807753 | 0 | 0 | 0.325411 | 0.83536464 |
| EGR1 | -1.0172383 | 0 | 0 | 0.35056648 | 0.8896137 |

**Supplementary Table 3** BEAM analyze relevant genes in Monocytes.

|  | gene_id | Cluster |
| --- | --- | --- |
| 1 | CD14 | 1 |
| 2 | LGALS2 | 1 |
| 3 | LYZ | 1 |
| 4 | MS4A6A | 1 |
| 5 | S100A12 | 1 |
| 6 | S100A8 | 1 |
| 7 | S100A9 | 1 |
| 8 | VCAN | 1 |
| 9 | NCF1 | 1 |
| 10 | CD99 | 1 |
| 11 | CD36 | 1 |
| 12 | MNDA | 1 |
| 13 | CLEC4E | 1 |
| 14 | CCR2 | 1 |
| 15 | RNASE6 | 1 |
| 16 | FCN1 | 1 |
| 17 | STAB1 | 1 |
| 18 | SELL | 1 |
| 19 | F13A1 | 1 |
| 20 | CPVL | 1 |
| 21 | GRN | 1 |
| 22 | HLA-DRA | 1 |
| 23 | MX1 | 1 |
| 24 | CAPG | 1 |
| 25 | ANXA1 | 1 |
| 26 | CRTAP | 1 |
| 27 | CD163 | 1 |
| 28 | IFI6 | 1 |
| 29 | ASGR2 | 1 |
| 30 | FOS | 1 |
| 31 | CXCL10 | 1 |
| 32 | CSF3R | 1 |
| 33 | NRG1 | 1 |
| 34 | PTAFR | 1 |
| 35 | ALDH2 | 1 |
| 36 | HLA-DRB1 | 1 |
| 37 | FOLR3 | 1 |
| 38 | ISG15 | 1 |
| 39 | ALDH1A1 | 1 |
| 40 | PLBD1 | 1 |
| 41 | HLA-DMB | 1 |
| 42 | CYP27A1 | 1 |
| 43 | IFI44L | 1 |
| 44 | CD1D | 1 |
| 45 | CD74 | 1 |
| 46 | XAF1 | 1 |
| 47 | PLP2 | 1 |
| 48 | AC020656.1 | 1 |
| 49 | KCTD12 | 1 |
| 50 | IFI44 | 1 |
| 51 | SIGLEC1 | 1 |
| 52 | VIM | 1 |
| 53 | LAP3 | 1 |
| 54 | GM2A | 1 |
| 55 | CEBPD | 1 |
| 56 | FCGR1A | 1 |
| 57 | LINC00937 | 1 |
| 58 | HLA-DPB1 | 1 |
| 59 | CSTA | 1 |
| 60 | ITGAM | 1 |
| 61 | EGR1 | 1 |
| 62 | G0S2 | 1 |
| 63 | GAPDH | 1 |
| 64 | PLD3 | 1 |
| 65 | AP1S2 | 1 |
| 66 | DUSP1 | 1 |
| 67 | APLP2 | 1 |
| 68 | LY86 | 1 |
| 69 | APOBEC3A | 1 |
| 70 | ZFP36L2 | 1 |
| 71 | HEXB | 1 |
| 72 | CLEC4D | 1 |
| 73 | PARP14 | 1 |
| 74 | TALDO1 | 1 |
| 75 | CYP1B1 | 1 |
| 76 | OAS3 | 1 |
| 77 | TFEC | 1 |
| 78 | VCAN-AS1 | 1 |
| 79 | JAML | 1 |
| 80 | QPCT | 1 |
| 81 | MGST1 | 1 |
| 82 | PLA2G7 | 1 |
| 83 | SIRPA | 1 |
| 84 | PXN | 1 |
| 85 | TPCN1 | 1 |
| 86 | RNASE2 | 1 |
| 87 | CLEC10A | 1 |
| 88 | HLA-DPA1 | 1 |
| 89 | AHNAK | 1 |
| 90 | S100A10 | 1 |
| 91 | FPR1 | 1 |
| 92 | IL13RA1 | 1 |
| 93 | METTL9 | 1 |
| 94 | LRP1 | 1 |
| 95 | PLSCR1 | 1 |
| 96 | STAT1 | 1 |
| 97 | CXCL8 | 1 |
| 98 | IL1RN | 1 |
| 99 | MEGF9 | 1 |
| 100 | NFE2 | 1 |
| 101 | TAGLN2 | 1 |
| 102 | EMB | 1 |
| 103 | SMARCD3 | 1 |
| 104 | IFIT1 | 1 |
| 105 | MX2 | 1 |
| 106 | HLA-DRB5 | 1 |
| 107 | HERC5 | 1 |
| 108 | TKT | 1 |
| 109 | CREG1 | 1 |
| 110 | TPT1 | 1 |
| 111 | BST1 | 1 |
| 112 | EPSTI1 | 1 |
| 113 | TNFSF10 | 1 |
| 114 | BLVRB | 1 |
| 115 | ASGR1 | 1 |
| 116 | ARMH1 | 1 |
| 117 | LMNA | 1 |
| 118 | SERPING1 | 1 |
| 119 | CRISPLD2 | 1 |
| 120 | IFIT3 | 1 |
| 121 | HBB | 1 |
| 122 | IFIT2 | 1 |
| 123 | PTPRE | 1 |
| 124 | SERPINB1 | 1 |
| 125 | MPEG1 | 1 |
| 126 | HLA-DQA1 | 1 |
| 127 | LMNB1 | 1 |
| 128 | TNFAIP2 | 1 |
| 129 | MYADM | 1 |
| 130 | CD63 | 1 |
| 131 | TGFBI | 1 |
| 132 | TNFSF13B | 1 |
| 133 | PID1 | 1 |
| 134 | SLC40A1 | 1 |
| 135 | FAM200B | 1 |
| 136 | CD93 | 1 |
| 137 | CATSPER1 | 1 |
| 138 | OAS2 | 1 |
| 139 | CREB5 | 1 |
| 140 | EIF2AK2 | 1 |
| 141 | PADI4 | 1 |
| 142 | CMPK2 | 1 |
| 143 | GLIPR2 | 1 |
| 144 | FGL2 | 1 |
| 145 | HLA-A | 1 |
| 146 | CCL2 | 1 |
| 147 | CDC42EP1 | 1 |
| 148 | MPP7 | 1 |
| 149 | SYNGR1 | 1 |
| 150 | ZNF467 | 1 |
| 151 | BNIP3L | 1 |
| 152 | IGFBP7 | 1 |
| 153 | SDCBP | 1 |
| 154 | NEXN | 1 |
| 155 | DPYD | 1 |
| 156 | RAB27A | 1 |
| 157 | PKM | 1 |
| 158 | LAMTOR1 | 1 |
| 159 | S1PR3 | 1 |
| 160 | AC116353.5 | 1 |
| 161 | CMTM3 | 1 |
| 162 | ATF5 | 1 |
| 163 | F5 | 1 |
| 164 | MARCKS | 1 |
| 165 | TREM1 | 1 |
| 166 | SCPEP1 | 1 |
| 167 | FCGR1B | 1 |
| 168 | ITGB2 | 1 |
| 169 | ALOX5AP | 1 |
| 170 | TMEM123 | 1 |
| 171 | IER3 | 1 |
| 172 | IFI16 | 1 |
| 173 | PLAAT3 | 1 |
| 174 | PGD | 1 |
| 175 | SAMD9L | 1 |
| 176 | GLRX | 1 |
| 177 | CCR1 | 1 |
| 178 | UBE2L6 | 1 |
| 179 | SLC2A9 | 1 |
| 180 | CACNA2D3 | 1 |
| 181 | HPSE | 1 |
| 182 | CD44 | 1 |
| 183 | ACTN1 | 1 |
| 184 | AGTRAP | 1 |
| 185 | GCA | 1 |
| 186 | CTSB | 1 |
| 187 | ID1 | 1 |
| 188 | JUNB | 1 |
| 189 | ODF3B | 1 |
| 190 | CD1C | 1 |
| 191 | VSIG4 | 1 |
| 192 | LAT2 | 1 |
| 193 | ANPEP | 1 |
| 194 | NCF4 | 1 |
| 195 | CST3 | 1 |
| 196 | CYP2S1 | 1 |
| 197 | PNPLA2 | 1 |
| 198 | RPLP1 | 1 |
| 199 | COMT | 1 |
| 200 | PADI2 | 1 |
| 201 | IL17RA | 1 |
| 202 | TNNT1 | 1 |
| 203 | LINC02723 | 1 |
| 204 | CTSA | 1 |
| 205 | AC103591.3 | 1 |
| 206 | CD300LB | 1 |
| 207 | FCGRT | 1 |
| 208 | ITGA5 | 1 |
| 209 | RSAD2 | 1 |
| 210 | UBE2D1 | 1 |
| 211 | OGFRL1 | 1 |
| 212 | PPT1 | 1 |
| 213 | SHTN1 | 1 |
| 214 | CIITA | 1 |
| 215 | MBOAT7 | 1 |
| 216 | TPM4 | 1 |
| 217 | MICAL2 | 1 |
| 218 | CKAP4 | 1 |
| 219 | IL6R | 1 |
| 220 | VNN2 | 1 |
| 221 | HCST | 1 |
| 222 | TTC7A | 1 |
| 223 | RASSF4 | 1 |
| 224 | TNFSF8 | 1 |
| 225 | DYNLT1 | 1 |
| 226 | TXN | 1 |
| 227 | AC010197.2 | 1 |
| 228 | GASK1B | 1 |
| 229 | FES | 1 |
| 230 | PLCB1 | 1 |
| 231 | ANXA6 | 1 |
| 232 | DYSF | 1 |
| 233 | SAMHD1 | 1 |
| 234 | SLC38A2 | 1 |
| 235 | TRIM22 | 1 |
| 236 | SORL1 | 1 |
| 237 | CD9 | 1 |
| 238 | GBP1 | 1 |
| 239 | ADAM15 | 1 |
| 240 | BST2 | 1 |
| 241 | PARP9 | 1 |
| 242 | NLRP12 | 1 |
| 243 | CD302 | 1 |
| 244 | ARHGEF40 | 1 |
| 245 | ERP29 | 1 |
| 246 | HEBP2 | 1 |
| 247 | MRPL33 | 1 |
| 248 | CDA | 1 |
| 249 | MSRB1 | 1 |
| 250 | HLA-DQB1 | 1 |
| 251 | CAST | 1 |
| 252 | ANKRD22 | 1 |
| 253 | IGSF6 | 1 |
| 254 | USP15 | 1 |
| 255 | GPR183 | 1 |
| 256 | RPLP0 | 1 |
| 257 | ADA2 | 1 |
| 258 | RNF213 | 1 |
| 259 | ST14 | 1 |
| 260 | MLKL | 1 |
| 261 | YBX3 | 1 |
| 262 | GIMAP7 | 1 |
| 263 | UTS2 | 1 |
| 264 | PSTPIP1 | 1 |
| 265 | HSPA5 | 1 |
| 266 | LY6E | 1 |
| 267 | LTB4R | 1 |
| 268 | CITED4 | 1 |
| 269 | SAT2 | 1 |
| 270 | AC005747.1 | 1 |
| 271 | NRGN | 1 |
| 272 | SGMS2 | 1 |
| 273 | HMGB2 | 1 |
| 274 | RPL37A | 1 |
| 275 | NAIP | 1 |
| 276 | ATP6V1A | 1 |
| 277 | PLXDC2 | 1 |
| 278 | CCDC149 | 1 |
| 279 | SLC18B1 | 1 |
| 280 | CLMN | 1 |
| 281 | FOLR2 | 1 |
| 282 | CARS2 | 1 |
| 283 | PSME2 | 1 |
| 284 | KIAA0319L | 1 |
| 285 | FHL3 | 1 |
| 286 | CAMK2D | 1 |
| 287 | OASL | 1 |
| 288 | AL034397.3 | 1 |
| 289 | APP | 1 |
| 290 | TMEM150B | 1 |
| 291 | GSN | 1 |
| 292 | NCOA4 | 1 |
| 293 | LRRK2 | 1 |
| 294 | IER2 | 1 |
| 295 | CCL3L3 | 1 |
| 296 | BAZ2B | 1 |
| 297 | CPNE2 | 1 |
| 298 | DDX60 | 1 |
| 299 | CXXC5 | 1 |
| 300 | ARHGAP26 | 1 |
| 301 | MARCO | 1 |
| 302 | HBA2 | 1 |
| 303 | EMP1 | 1 |
| 304 | NCOA7 | 1 |
| 305 | TLR7 | 1 |
| 306 | IDH1 | 1 |
| 307 | SULT1A1 | 1 |
| 308 | AOAH | 1 |
| 309 | AL691403.1 | 1 |
| 310 | CCL3 | 1 |
| 311 | APOBR | 1 |
| 312 | FCER1A | 1 |
| 313 | APOL6 | 1 |
| 314 | CAPN2 | 1 |
| 315 | IRF7 | 1 |
| 316 | ITGB7 | 1 |
| 317 | PNPT1 | 1 |
| 318 | CALR | 1 |
| 319 | P4HB | 1 |
| 320 | PEA15 | 1 |
| 321 | TMEM71 | 1 |
| 322 | CANX | 1 |
| 323 | ETHE1 | 1 |
| 324 | IQGAP2 | 1 |
| 325 | DDX58 | 1 |
| 326 | ZFP36 | 1 |
| 327 | CTNNBIP1 | 1 |
| 328 | MARVELD1 | 1 |
| 329 | ARHGAP9 | 1 |
| 330 | IFI35 | 1 |
| 331 | RPL35A | 1 |
| 332 | NUP214 | 1 |
| 333 | CLEC11A | 1 |
| 334 | PCSK5 | 1 |
| 335 | FBXL5 | 1 |
| 336 | CTSH | 1 |
| 337 | MYCL | 1 |
| 338 | SYK | 1 |
| 339 | EVI2B | 1 |
| 340 | SLC46A2 | 1 |
| 341 | IFIH1 | 1 |
| 342 | STING1 | 1 |
| 343 | STAT2 | 1 |
| 344 | INPPL1 | 1 |
| 345 | TYMP | 1 |
| 346 | RPS13 | 1 |
| 347 | RNASE1 | 1 |
| 348 | MAP3K7CL | 1 |
| 349 | IL1B | 1 |
| 350 | TMEM8B | 1 |
| 351 | TRG-AS1 | 1 |
| 352 | OAF | 1 |
| 353 | CPD | 1 |
| 354 | LINC00963 | 1 |
| 355 | ETV7 | 1 |
| 356 | MARCHF1 | 1 |
| 357 | LRMDA | 1 |
| 358 | FRMD4B | 1 |
| 359 | GLIPR1 | 1 |
| 360 | FERMT3 | 1 |
| 361 | ZFP36L1 | 1 |
| 362 | RPL31 | 1 |
| 363 | SQSTM1 | 1 |
| 364 | RPL29 | 1 |
| 365 | ACADVL | 1 |
| 366 | RBP7 | 1 |
| 367 | OSBPL1A | 1 |
| 368 | SRGN | 1 |
| 369 | MFSD2A | 1 |
| 370 | CEBPE | 1 |
| 371 | TSPO | 1 |
| 372 | GRAMD4 | 1 |
| 373 | RGS2 | 1 |
| 374 | SNCA | 1 |
| 375 | XBP1 | 1 |
| 376 | NAGK | 1 |
| 377 | HBA1 | 1 |
| 378 | TIMP2 | 1 |
| 379 | EPHX1 | 1 |
| 380 | CXorf21 | 1 |
| 381 | IL4I1 | 1 |
| 382 | TOR1B | 1 |
| 383 | CCNY | 1 |
| 384 | THBS1 | 1 |
| 385 | RPL37 | 1 |
| 386 | CD33 | 1 |
| 387 | PYGL | 1 |
| 388 | SLC11A1 | 1 |
| 389 | SCARF1 | 1 |
| 390 | SQOR | 1 |
| 391 | NARS1 | 1 |
| 392 | YPEL3 | 1 |
| 393 | FZD2 | 1 |
| 394 | SHROOM1 | 1 |
| 395 | UAP1L1 | 1 |
| 396 | ZBP1 | 1 |
| 397 | ARRDC4 | 1 |
| 398 | NCF2 | 1 |
| 399 | ADAR | 1 |
| 400 | FAM118A | 1 |
| 401 | STEAP4 | 1 |
| 402 | TM6SF1 | 1 |
| 403 | TST | 1 |
| 404 | CUL1 | 1 |
| 405 | LHFPL2 | 1 |
| 406 | KLF10 | 1 |
| 407 | MCL1 | 1 |
| 408 | JUND | 1 |
| 409 | KCNQ1 | 1 |
| 410 | GLT1D1 | 1 |
| 411 | SIGLEC7 | 1 |
| 412 | RNF130 | 1 |
| 413 | DNAJC10 | 1 |
| 414 | FCGR2B | 1 |
| 415 | MGST2 | 1 |
| 416 | IL27RA | 1 |
| 417 | KLF13 | 1 |
| 418 | SAMD9 | 1 |
| 419 | TNFRSF1A | 1 |
| 420 | MPST | 1 |
| 421 | TIFA | 1 |
| 422 | CROCC | 1 |
| 423 | SPNS3 | 1 |
| 424 | TMEM176B | 1 |
| 425 | TBC1D14 | 1 |
| 426 | CACNA2D4 | 1 |
| 427 | KDM7A | 1 |
| 428 | TACC3 | 1 |
| 429 | FLOT1 | 1 |
| 430 | HINT3 | 1 |
| 431 | LGALS3 | 1 |
| 432 | MCEMP1 | 1 |
| 433 | FLT3 | 1 |
| 434 | CAVIN3 | 1 |
| 435 | FURIN | 1 |
| 436 | NIBAN2 | 1 |
| 437 | SPATS2L | 1 |
| 438 | GPR162 | 1 |
| 439 | PTRHD1 | 1 |
| 440 | LAMP2 | 1 |
| 441 | IFNGR1 | 1 |
| 442 | SOCS6 | 1 |
| 443 | AL161785.1 | 1 |
| 444 | CNPY3 | 1 |
| 445 | CCR5AS | 1 |
| 446 | CAMTA1 | 1 |
| 447 | IGHA1 | 1 |
| 448 | ARHGEF10L | 1 |
| 449 | TLR5 | 1 |
| 450 | CSF2RA | 1 |
| 451 | HNMT | 1 |
| 452 | ATP6V1F | 1 |
| 453 | TLR2 | 1 |
| 454 | PDIA6 | 1 |
| 455 | TMEM167A | 1 |
| 456 | CERS2 | 1 |
| 457 | GIMAP4 | 1 |
| 458 | FUT7 | 1 |
| 459 | SLC22A16 | 1 |
| 460 | ENTPD6 | 1 |
| 461 | SCARB1 | 1 |
| 462 | CTSZ | 1 |
| 463 | C5orf15 | 1 |
| 464 | ATP6V0A1 | 1 |
| 465 | PPM1K | 1 |
| 466 | ZNF385A | 1 |
| 467 | S100A6 | 1 |
| 468 | TMEM219 | 1 |
| 469 | TAP1 | 1 |
| 470 | MAP2K6 | 1 |
| 471 | TMX4 | 1 |
| 472 | BTF3 | 1 |
| 473 | ICAM1 | 1 |
| 474 | NLRP3 | 1 |
| 475 | EEF2 | 1 |
| 476 | RAB11FIP1 | 1 |
| 477 | ADAM19 | 1 |
| 478 | RPL19 | 1 |
| 479 | TCEAL4 | 1 |
| 480 | MLXIP | 1 |
| 481 | SCO2 | 1 |
| 482 | CIDEB | 1 |
| 483 | ZNF395 | 1 |
| 484 | MT1F | 1 |
| 485 | DUSP3 | 1 |
| 486 | DPP7 | 1 |
| 487 | GPR84 | 1 |
| 488 | PLEKHO1 | 1 |
| 489 | SEPTIN4 | 1 |
| 490 | SLC27A1 | 1 |
| 491 | SLAMF8 | 1 |
| 492 | HSP90B1 | 1 |
| 493 | SOCS3 | 1 |
| 494 | IQCD | 1 |
| 495 | LIPA | 1 |
| 496 | C9orf139 | 1 |
| 497 | RAB44 | 1 |
| 498 | C12orf45 | 1 |
| 499 | CLIC4 | 1 |
| 500 | ESD | 1 |
| 501 | MIF4GD | 1 |
| 502 | EVA1B | 1 |
| 503 | GSTM4 | 1 |
| 504 | DUSP2 | 1 |
| 505 | ADAM8 | 1 |
| 506 | TUBB6 | 1 |
| 507 | GPCPD1 | 1 |
| 508 | IQGAP1 | 1 |
| 509 | OTULINL | 1 |
| 510 | NREP | 1 |
| 511 | CCDC88A | 1 |
| 512 | LGALS8 | 1 |
| 513 | RTN1 | 1 |
| 514 | TRMT1 | 1 |
| 515 | ACAP1 | 1 |
| 516 | RASAL2 | 1 |
| 517 | TSHZ3 | 1 |
| 518 | JAK2 | 1 |
| 519 | CLEC12A | 1 |
| 520 | PDIA5 | 1 |
| 521 | SNHG6 | 1 |
| 522 | MCUB | 1 |
| 523 | G6PD | 1 |
| 524 | LDLR | 1 |
| 525 | BHLHE40 | 1 |
| 526 | PPA1 | 1 |
| 527 | ATP6AP2 | 1 |
| 528 | PLIN3 | 1 |
| 529 | SREK1IP1 | 1 |
| 530 | NPC2 | 1 |
| 531 | RBMS2 | 1 |
| 532 | NDRG2 | 1 |
| 533 | FAM111A | 1 |
| 534 | NFE2L3 | 1 |
| 535 | RELL1 | 1 |
| 536 | NDUFB11 | 1 |
| 537 | PLBD2 | 1 |
| 538 | TMEM170B | 1 |
| 539 | ITGAE | 1 |
| 540 | BCL9L | 1 |
| 541 | DGKZ | 1 |
| 542 | CASC8 | 1 |
| 543 | CES1 | 1 |
| 544 | RAB32 | 1 |
| 545 | MACROH2A1 | 1 |
| 546 | EIF4G3 | 1 |
| 547 | CTSS | 1 |
| 548 | NT5DC2 | 1 |
| 549 | AZI2 | 1 |
| 550 | LTF | 1 |
| 551 | SH3KBP1 | 1 |
| 552 | RTN3 | 1 |
| 553 | MPZL2 | 1 |
| 554 | RNF217 | 1 |
| 555 | SP100 | 1 |
| 556 | DAPP1 | 1 |
| 557 | IFT20 | 1 |
| 558 | RILP | 1 |
| 559 | PRRC2B | 1 |
| 560 | PRCP | 1 |
| 561 | RSL1D1 | 1 |
| 562 | SIGLEC9 | 1 |
| 563 | SLC22A4 | 1 |
| 564 | CD1B | 1 |
| 565 | APOL3 | 1 |
| 566 | CITED2 | 1 |
| 567 | MAGEF1 | 1 |
| 568 | SYTL3 | 1 |
| 569 | ARHGAP10 | 1 |
| 570 | MAML2 | 1 |
| 571 | BATF | 1 |
| 572 | SMYD2 | 1 |
| 573 | PPIF | 1 |
| 574 | RAB34 | 1 |
| 575 | SIRPB2 | 1 |
| 576 | ATG7 | 1 |
| 577 | WLS | 1 |
| 578 | IRF8 | 1 |
| 579 | HEBP1 | 1 |
| 580 | SMIM10L1 | 1 |
| 581 | CMIP | 1 |
| 582 | EFCAB2 | 1 |
| 583 | IRS2 | 1 |
| 584 | NOL3 | 1 |
| 585 | PRKAG2-AS1 | 1 |
| 586 | HP | 1 |
| 587 | SSR1 | 1 |
| 588 | FKBP5 | 1 |
| 589 | VGLL4 | 1 |
| 590 | SULF2 | 1 |
| 591 | BTG1 | 1 |
| 592 | FCGR3A | 2 |
| 593 | CDKN1C | 2 |
| 594 | IFITM2 | 2 |
| 595 | SMIM25 | 2 |
| 596 | LST1 | 2 |
| 597 | RHOC | 2 |
| 598 | RPS19 | 2 |
| 599 | C1QB | 2 |
| 600 | TUBA1B | 2 |
| 601 | C1QA | 2 |
| 602 | SAT1 | 2 |
| 603 | CD52 | 2 |
| 604 | COTL1 | 2 |
| 605 | NR4A1 | 2 |
| 606 | BCL2A1 | 2 |
| 607 | KLF2 | 2 |
| 608 | AIF1 | 2 |
| 609 | HES4 | 2 |
| 610 | ABI3 | 2 |
| 611 | TIMP1 | 2 |
| 612 | IFITM3 | 2 |
| 613 | WARS1 | 2 |
| 614 | NAP1L1 | 2 |
| 615 | FTL | 2 |
| 616 | CEBPB | 2 |
| 617 | CTSL | 2 |
| 618 | SIGLEC10 | 2 |
| 619 | CSF1R | 2 |
| 620 | TCF7L2 | 2 |
| 621 | ITGAL | 2 |
| 622 | PECAM1 | 2 |
| 623 | IER5 | 2 |
| 624 | EVL | 2 |
| 625 | CTSC | 2 |
| 626 | C5AR1 | 2 |
| 627 | HES1 | 2 |
| 628 | MTSS1 | 2 |
| 629 | FTH1 | 2 |
| 630 | RHOB | 2 |
| 631 | LILRB2 | 2 |
| 632 | PLAC8 | 2 |
| 633 | RRAS | 2 |
| 634 | CXCL16 | 2 |
| 635 | TNFRSF1B | 2 |
| 636 | P2RX1 | 2 |
| 637 | LRRC25 | 2 |
| 638 | SEPTIN9 | 2 |
| 639 | LYN | 2 |
| 640 | INSIG1 | 2 |
| 641 | CLEC4F | 2 |
| 642 | HSPA8 | 2 |
| 643 | ADGRE5 | 2 |
| 644 | NFKBIZ | 2 |
| 645 | MS4A4A | 2 |
| 646 | CSTB | 2 |
| 647 | HMOX1 | 2 |
| 648 | FCER1G | 2 |
| 649 | TUBA1A | 2 |
| 650 | HCK | 2 |
| 651 | SOD1 | 2 |
| 652 | PTPN6 | 2 |
| 653 | ADA | 2 |
| 654 | TSC22D3 | 2 |
| 655 | SELPLG | 2 |
| 656 | SERPINA1 | 2 |
| 657 | NEURL1 | 2 |
| 658 | CSK | 2 |
| 659 | EMP3 | 2 |
| 660 | LTB | 2 |
| 661 | SLC44A2 | 2 |
| 662 | CYFIP2 | 2 |
| 663 | MYL6 | 2 |
| 664 | LILRB1 | 2 |
| 665 | PFN1 | 2 |
| 666 | TSPAN14 | 2 |
| 667 | FAM110A | 2 |
| 668 | DRAP1 | 2 |
| 669 | C1QC | 2 |
| 670 | YBX1 | 2 |
| 671 | BIN2 | 2 |
| 672 | GPBAR1 | 2 |
| 673 | CKB | 2 |
| 674 | JPT1 | 2 |
| 675 | CUX1 | 2 |
| 676 | ZNF703 | 2 |
| 677 | MARCKSL1 | 2 |
| 678 | ICAM2 | 2 |
| 679 | SLC2A6 | 2 |
| 680 | HSPB1 | 2 |
| 681 | NSMF | 2 |
| 682 | HLA-E | 2 |
| 683 | PTP4A3 | 2 |
| 684 | ARAP1 | 2 |
| 685 | TESC | 2 |
| 686 | ADGRE2 | 2 |
| 687 | SIDT2 | 2 |
| 688 | UTRN | 2 |
| 689 | CAPZB | 2 |
| 690 | CYTIP | 2 |
| 691 | PILRA | 2 |
| 692 | ASAH1 | 2 |
| 693 | LILRA1 | 2 |
| 694 | LYPD2 | 2 |
| 695 | SYTL1 | 2 |
| 696 | AC064805.1 | 2 |
| 697 | TMC6 | 2 |
| 698 | MAPKAPK3 | 2 |
| 699 | ITGAX | 2 |
| 700 | C3AR1 | 2 |
| 701 | AC104809.2 | 2 |
| 702 | MALAT1 | 2 |
| 703 | BID | 2 |
| 704 | MAFB | 2 |
| 705 | VMO1 | 2 |
| 706 | RARA | 2 |
| 707 | PKN1 | 2 |
| 708 | VASP | 2 |
| 709 | AP2A1 | 2 |
| 710 | NACA | 2 |
| 711 | SH2D3C | 2 |
| 712 | SNED1 | 2 |
| 713 | HOTAIRM1 | 2 |
| 714 | STK10 | 2 |
| 715 | EHBP1L1 | 2 |
| 716 | TNF | 2 |
| 717 | RFTN1 | 2 |
| 718 | RNF149 | 2 |
| 719 | LINC02345 | 2 |
| 720 | SYNGR2 | 2 |
| 721 | TBC1D10C | 2 |
| 722 | HSP90AA1 | 2 |
| 723 | CAMK1 | 2 |
| 724 | C20orf27 | 2 |
| 725 | RUNX3 | 2 |
| 726 | ICAM4 | 2 |
| 727 | BATF3 | 2 |
| 728 | IFI27 | 2 |
| 729 | LYST | 2 |
| 730 | HSP90AB1 | 2 |
| 731 | RASGRP2 | 2 |
| 732 | MT-CO2 | 2 |
| 733 | PLD4 | 2 |
| 734 | HK3 | 2 |
| 735 | CDH23 | 2 |
| 736 | C12orf57 | 2 |
| 737 | KLF3 | 2 |
| 738 | NAAA | 2 |
| 739 | PPDPF | 2 |
| 740 | EZR | 2 |
| 741 | MERTK | 2 |
| 742 | TAGLN | 2 |
| 743 | PTPRC | 2 |
| 744 | SPI1 | 2 |
| 745 | POU2F2 | 2 |
| 746 | ID2 | 2 |
| 747 | CAP1 | 2 |
| 748 | SVIL | 2 |
| 749 | CKS1B | 2 |
| 750 | MIDN | 2 |
| 751 | PHF19 | 2 |
| 752 | FMNL2 | 2 |
| 753 | RAC2 | 2 |
| 754 | MGLL | 2 |
| 755 | ATP1A1 | 2 |
| 756 | RHOF | 2 |
| 757 | MYO1G | 2 |
| 758 | RAB10 | 2 |
| 759 | RASAL3 | 2 |
| 760 | CIRBP | 2 |
| 761 | GNG2 | 2 |
| 762 | LCP2 | 2 |
| 763 | LINC02432 | 2 |
| 764 | ARHGDIB | 2 |
| 765 | FLNA | 2 |
| 766 | EML4 | 2 |
| 767 | ABRACL | 2 |
| 768 | CNIH4 | 2 |
| 769 | TPM3 | 2 |
| 770 | CD300A | 2 |
| 771 | EAF2 | 2 |
| 772 | DUSP5 | 2 |
| 773 | IKZF1 | 2 |
| 774 | TTYH3 | 2 |
| 775 | CD83 | 2 |
| 776 | STXBP2 | 2 |
| 777 | KLF4 | 2 |
| 778 | TNFRSF8 | 2 |
| 779 | ATP1B3 | 2 |
| 780 | CHST15 | 2 |
| 781 | SNX18 | 2 |
| 782 | ADGRE1 | 2 |
| 783 | LFNG | 2 |
| 784 | NAMPT | 2 |
| 785 | SLC9A3R1 | 2 |
| 786 | CALHM6 | 2 |
| 787 | CEACAM3 | 2 |
| 788 | S1PR4 | 2 |
| 789 | PAPSS2 | 2 |
| 790 | SEC14L1 | 2 |
| 791 | RPL8 | 2 |
| 792 | PIK3AP1 | 2 |
| 793 | PIK3CG | 2 |
| 794 | RAP1B | 2 |
| 795 | HCAR3 | 2 |
| 796 | DDX5 | 2 |
| 797 | AC002316.1 | 2 |
| 798 | PRR5L | 2 |
| 799 | HSPH1 | 2 |
| 800 | PGK1 | 2 |
| 801 | UQCRB | 2 |
| 802 | HSBP1 | 2 |
| 803 | YWHAZ | 2 |
| 804 | COX6C | 2 |
| 805 | PTMA | 2 |
| 806 | ARPC2 | 2 |
| 807 | RGL4 | 2 |
| 808 | SFMBT2 | 2 |
| 809 | PPM1N | 2 |
| 810 | WASF2 | 2 |
| 811 | CCND3 | 2 |
| 812 | MSR1 | 2 |
| 813 | ARHGAP1 | 2 |
| 814 | ENHO | 2 |
| 815 | AC004687.1 | 2 |
| 816 | LIMD1 | 2 |
| 817 | TUBB | 2 |
| 818 | HCLS1 | 2 |
| 819 | ARHGAP4 | 2 |
| 820 | PPCDC | 2 |
| 821 | SRSF5 | 2 |
| 822 | ZFAND5 | 2 |
| 823 | MYL12B | 2 |
| 824 | TMPO | 2 |
| 825 | IGFBP6 | 2 |
| 826 | ACTB | 2 |
| 827 | FAM162A | 2 |
| 828 | AMPD2 | 2 |
| 829 | NDUFA4 | 2 |
| 830 | RASSF5 | 2 |
| 831 | PCGF5 | 2 |
| 832 | ARAP2 | 2 |
| 833 | LINC02384 | 2 |
| 834 | CRIP2 | 2 |
| 835 | H2AZ1 | 2 |
| 836 | PLAGL2 | 2 |
| 837 | SGPP1 | 2 |
| 838 | FGD2 | 2 |
| 839 | CASP5 | 2 |
| 840 | ATF3 | 2 |
| 841 | CD300LF | 2 |
| 842 | RBM38 | 2 |
| 843 | SPRED1 | 2 |
| 844 | HIC1 | 2 |
| 845 | KNDC1 | 2 |
| 846 | TCIRG1 | 2 |
| 847 | TMEM134 | 2 |
| 848 | GDI2 | 2 |
| 849 | OGDH | 2 |
| 850 | PI3 | 2 |
| 851 | PPP1CA | 2 |
| 852 | DUS2 | 2 |
| 853 | SLC25A25 | 2 |
| 854 | MLC1 | 2 |
| 855 | UBE2J1 | 2 |
| 856 | HK1 | 2 |
| 857 | C3orf14 | 2 |
| 858 | L1TD1 | 2 |
| 859 | RHOG | 2 |
| 860 | CROCC2 | 2 |
| 861 | SNAPC3 | 2 |
| 862 | SH3BP2 | 2 |
| 863 | CHCHD10 | 2 |
| 864 | FAM89B | 2 |
| 865 | PTGES3 | 2 |
| 866 | CHST2 | 2 |
| 867 | CYTH4 | 2 |
| 868 | PMVK | 2 |
| 869 | RINL | 2 |
| 870 | GRASP | 2 |
| 871 | CDKN2D | 2 |
| 872 | ZBTB7A | 2 |
| 873 | NEAT1 | 2 |
| 874 | MYD88 | 2 |
| 875 | FCGR3B | 2 |
| 876 | PFKL | 2 |
| 877 | VAMP5 | 2 |
| 878 | PNPLA6 | 2 |
| 879 | GNGT2 | 2 |
| 880 | SLC29A1 | 2 |
| 881 | CDK2AP1 | 2 |
| 882 | TTC9 | 2 |
| 883 | HNRNPDL | 2 |
| 884 | SNRPC | 2 |
| 885 | WSB1 | 2 |
| 886 | ACTG1 | 2 |
| 887 | STK40 | 2 |
| 888 | LILRA5 | 2 |
| 889 | RGS19 | 2 |
| 890 | IL10RB-DT | 2 |
| 891 | MFSD12 | 2 |
| 892 | ERGIC1 | 2 |
| 893 | TMC8 | 2 |
| 894 | CDKN1A | 2 |
| 895 | GPR137B | 2 |
| 896 | VPS29 | 2 |
| 897 | MAP2K3 | 2 |
| 898 | RELT | 2 |
| 899 | TBCB | 2 |
| 900 | KIF21B | 2 |
| 901 | AC090559.1 | 2 |
| 902 | BTK | 2 |
| 903 | FPR3 | 2 |
| 904 | CFD | 2 |
| 905 | CDC42 | 2 |
| 906 | NT5DC4 | 2 |
| 907 | SERPINB9 | 2 |
| 908 | UBASH3B | 2 |
| 909 | JDP2 | 2 |
| 910 | LRRFIP1 | 2 |
| 911 | UBB | 2 |
| 912 | PITPNM1 | 2 |
| 913 | SCGB3A1 | 2 |
| 914 | STIM2 | 2 |
| 915 | RIN1 | 2 |
| 916 | IVD | 2 |
| 917 | PMAIP1 | 2 |
| 918 | PSMA7 | 2 |
| 919 | AC147067.1 | 2 |
| 920 | EPS8 | 2 |
| 921 | TXNIP | 2 |
| 922 | RPS27 | 2 |
| 923 | SH2D1B | 2 |
| 924 | METRNL | 2 |
| 925 | SLC25A5 | 2 |
| 926 | C11orf21 | 2 |
| 927 | CX3CR1 | 2 |
| 928 | RXRA | 2 |
| 929 | MBD2 | 2 |
| 930 | MYO18A | 2 |
| 931 | TMSB4X | 2 |
| 932 | POFUT1 | 2 |
| 933 | MYOF | 2 |
| 934 | PAG1 | 2 |
| 935 | CAPNS1 | 2 |
| 936 | H2BC5 | 2 |
| 937 | PGLYRP2 | 2 |
| 938 | PHTF2 | 2 |
| 939 | BEGAIN | 2 |
| 940 | TMEM63C | 2 |
| 941 | KCNMA1 | 2 |
| 942 | IL21R | 2 |
| 943 | CD81 | 2 |
| 944 | PHC1 | 2 |
| 945 | SHISA4 | 2 |
| 946 | ASB2 | 2 |
| 947 | DPEP2 | 2 |
| 948 | GPATCH4 | 2 |
| 949 | PRELID1 | 2 |
| 950 | NEDD9 | 2 |
| 951 | RMC1 | 2 |
| 952 | MRPS35 | 2 |
| 953 | ABCC3 | 2 |
| 954 | LSM7 | 2 |
| 955 | THYN1 | 2 |

**Supplementary Table 4** Comparison of differentially expressed genes in two groups of NKT cells.

| gene_id | avg_logFC | p_val | p_val_adj | POF | CON |
| --- | --- | --- | --- | --- | --- |
| HBB | 4.489185 | 3.37E-127 | 6.19E-123 | 1.4709525 | 0.01757326 |
| HBA2 | 3.7072668 | 4.42E-86 | 4.06E-82 | 1.0527811 | 0.055718616 |
| HBA1 | 2.485628 | 4.08E-65 | 2.49E-61 | 1.0080695 | 0.15531912 |
| S100B | 1.9377441 | 1.94E-35 | 3.24E-32 | 0.5237183 | 0.02036412 |
| ZNF683 | 0.93181354 | 1.48E-16 | 4.52E-14 | 0.49802518 | 0.17931652 |
| GZMB | 0.7067746 | 7.57E-37 | 1.39E-33 | 2.9812903 | 2.407158 |
| PRSS57 | 0.6944692 | 4.79E-14 | 1.10E-11 | 0.20087823 | 0.02694106 |
| HLA-DRB1 | 0.6186221 | 1.55E-12 | 3.08E-10 | 1.4479475 | 1.0937486 |
| TRDC | 0.5714026 | 5.97E-25 | 3.32E-22 | 1.6705714 | 1.0445155 |
| AOAH | 0.52891415 | 4.37E-08 | 5.53E-06 | 0.61817795 | 0.39621362 |
| IGHA1 | 0.513572 | 2.67E-11 | 4.68E-09 | 0.28441018 | 0.10542894 |
| IGFBP7 | 0.50501317 | 4.06E-06 | 0.000381482 | 0.30140448 | 0.15603137 |
| GNLY | 0.49569908 | 1.93E-29 | 1.54E-26 | 4.141595 | 3.5418026 |
| HLA-DPB1 | 0.49371728 | 8.90E-16 | 2.47E-13 | 1.45763 | 1.0701486 |
| GTF3C1 | 0.48971123 | 1.74E-07 | 2.12E-05 | 0.48621944 | 0.2921881 |
| TPI1 | 0.48825112 | 4.61E-12 | 9.01E-10 | 1.3215569 | 1.0030464 |
| KIR3DL1 | 0.4670761 | 2.20E-06 | 0.000225501 | 0.29252595 | 0.15006277 |
| SH2D1B | 0.44751498 | 5.41E-06 | 0.000488964 | 0.48792732 | 0.3070262 |
| IGLC2 | 0.4436151 | 2.75E-07 | 3.21E-05 | 0.18406098 | 0.063309684 |
| PRSS23 | 0.44252247 | 1.31E-07 | 1.64E-05 | 0.79066986 | 0.55813843 |
| H1-10 | 0.44147906 | 3.20E-05 | 0.002451113 | 0.8271546 | 0.6175964 |
| FCGR3A | 0.4395838 | 1.33E-13 | 2.87E-11 | 2.0505514 | 1.7343297 |
| ITGB1 | 0.42536995 | 5.79E-09 | 8.31E-07 | 0.93769807 | 0.6752555 |
| DSTN | 0.4199617 | 7.95E-07 | 8.59E-05 | 0.768393 | 0.5563612 |
| SH2D2A | 0.39672396 | 7.92E-05 | 0.005302229 | 0.9849207 | 0.7902398 |
| CD52 | 0.3959302 | 1.19E-20 | 5.10E-18 | 3.5245821 | 3.099557 |
| LGALS3 | 0.38736734 | 6.54E-06 | 0.000574472 | 0.3866927 | 0.23504277 |
| KLRC4-KLRK1 | 0.3828175 | 0.000155529 | 0.00941708 | 0.36850926 | 0.24009205 |
| LINC00623 | 0.38267064 | 0.000538963 | 0.025762146 | 0.30316615 | 0.18731955 |
| PATL2 | 0.37786463 | 0.000134155 | 0.008318974 | 0.5302772 | 0.377238 |
| ISCU | 0.37670556 | 0.000260433 | 0.014179517 | 0.6282339 | 0.47304118 |
| AKAP5 | 0.3741621 | 3.39E-05 | 0.002568071 | 0.22499351 | 0.114175186 |
| CTSW | 0.37373808 | 4.95E-12 | 9.57E-10 | 2.5019028 | 2.2003553 |
| ERAP2 | 0.35884494 | 4.09E-06 | 0.000381482 | 0.25595725 | 0.13066395 |
| MXRA7 | 0.35759184 | 0.000237778 | 0.013106351 | 0.28054368 | 0.16885886 |
| POLR3GL | 0.35458285 | 4.75E-05 | 0.003445632 | 0.46553567 | 0.31657493 |
| COX6C | 0.3536862 | 0.000182467 | 0.010769052 | 1.1885384 | 1.0082473 |
| PLEK | 0.3522614 | 1.85E-06 | 0.000190975 | 1.4840134 | 1.2724779 |
| CD47 | 0.3514451 | 1.56E-05 | 0.001305166 | 0.77458096 | 0.59076875 |
| C1orf21 | 0.33571494 | 0.000183529 | 0.010780774 | 0.8205089 | 0.6504681 |
| PLEKHA2 | 0.3349112 | 0.008212231 | 0.177184575 | 0.4126025 | 0.30699587 |
| CD74 | 0.33427137 | 2.93E-09 | 4.34E-07 | 2.7683558 | 2.456928 |
| NCALD | 0.3324617 | 0.000778323 | 0.03361438 | 0.30077887 | 0.19456844 |
| SKP1 | 0.33224663 | 0.000147431 | 0.00899038 | 1.1926656 | 1.0251788 |
| ANXA1 | 0.33067408 | 1.39E-07 | 1.71E-05 | 1.9941105 | 1.7613909 |
| CPT1A | 0.32494938 | 2.02E-05 | 0.001614469 | 0.35648426 | 0.22307071 |
| IDI1 | 0.32462174 | 0.000967544 | 0.03990848 | 0.4639112 | 0.33718747 |
| PSMA4 | 0.32396957 | 0.003131732 | 0.095170421 | 0.59524935 | 0.4693997 |
| TPST2 | 0.3233917 | 0.002063036 | 0.069902256 | 0.82596326 | 0.6849739 |
| PDE3B | 0.32194254 | 0.002490865 | 0.079100047 | 0.20344555 | 0.118315466 |
| HLA-DRA | 0.32161462 | 0.003334613 | 0.098561702 | 0.7342707 | 0.5974638 |
| ITGAX | 0.31862476 | 0.000231063 | 0.012851995 | 0.5301559 | 0.38813257 |
| APMAP | 0.31659633 | 0.00018384 | 0.010780774 | 1.0809423 | 0.91547287 |
| TMED9 | 0.31332347 | 0.001947837 | 0.067970631 | 0.6404504 | 0.50981104 |
| XCL1 | 0.3118913 | 0.004090494 | 0.112485053 | 0.25801635 | 0.16688122 |
| TMEM71 | 0.3083277 | 0.010675543 | 0.205182811 | 0.27381122 | 0.19022328 |
| S100A4 | 0.30792686 | 1.30E-10 | 2.16E-08 | 3.1810727 | 2.9910507 |
| ADAM10 | 0.30738783 | 0.00114661 | 0.045357833 | 0.44483852 | 0.3251981 |
| HDDC2 | 0.29683822 | 0.000135549 | 0.00837708 | 0.7436954 | 0.5739446 |
| SYTL3 | 0.29679036 | 0.004206166 | 0.112871607 | 0.6455458 | 0.51955736 |
| SOS1 | 0.29376495 | 0.005205947 | 0.131982259 | 0.20112799 | 0.123088166 |
| CD226 | 0.29307953 | 0.000125207 | 0.007816947 | 0.3483095 | 0.2300539 |
| SLC9A3R1 | 0.29298976 | 1.42E-05 | 0.00120066 | 1.474466 | 1.2830848 |
| UBB | 0.28962454 | 6.31E-09 | 8.91E-07 | 2.5990915 | 2.3905718 |
| IGHM | 0.2889402 | 0.000753687 | 0.032937896 | 0.20362143 | 0.117280506 |
| SCP2 | 0.28857365 | 0.005759214 | 0.14095477 | 0.6027023 | 0.48698258 |
| SRSF11 | 0.28620756 | 0.009169208 | 0.186586273 | 0.738335 | 0.6259392 |
| RBM8A | 0.28204882 | 0.001295616 | 0.049440821 | 1.0275215 | 0.87999076 |
| TRAFD1 | 0.28190938 | 0.003615254 | 0.104592634 | 0.19278036 | 0.115977265 |
| MFSD10 | 0.2786291 | 0.010407804 | 0.201301617 | 0.34739402 | 0.25824624 |
| TNFAIP3 | 0.27818984 | 0.012324541 | 0.222435548 | 0.30259684 | 0.21772474 |
| RABAC1 | 0.27584636 | 0.011030745 | 0.209812762 | 0.503438 | 0.3997586 |
| STAT4 | 0.27473915 | 0.007928411 | 0.172833706 | 0.5890338 | 0.4793931 |
| MVD | 0.27447182 | 0.012465517 | 0.223685714 | 0.32825384 | 0.24218617 |
| CCNDBP1 | 0.27314973 | 0.009230516 | 0.187004555 | 0.5754664 | 0.46569926 |
| CLIC3 | 0.27186614 | 0.000107626 | 0.006828399 | 1.0318137 | 0.83555514 |
| PRPF6 | 0.26899198 | 0.003242139 | 0.097057594 | 0.3904894 | 0.289466 |
| C1orf162 | 0.2668032 | 0.003388995 | 0.10000805 | 0.48102644 | 0.36529148 |
| TSEN54 | 0.2664572 | 0.005032362 | 0.128627693 | 0.55796915 | 0.44863713 |
| B2M | 0.26301578 | 2.85E-62 | 1.31E-58 | 5.767802 | 5.5867133 |
| PTMS | 0.26225027 | 0.037609535 | 0.416610153 | 0.51465815 | 0.42400712 |
| CYBA | 0.2611197 | 2.05E-07 | 2.44E-05 | 2.52611 | 2.3080385 |
| RTCB | 0.26074225 | 0.003851452 | 0.109263361 | 0.213372 | 0.13595332 |
| PCBP2 | 0.26039353 | 0.001647564 | 0.059412645 | 0.9570553 | 0.8303573 |
| UQCRC1 | 0.25894415 | 0.010423401 | 0.201391077 | 0.39126486 | 0.29769522 |
| RPUSD3 | 0.2587998 | 0.005170414 | 0.131262729 | 0.29227707 | 0.2057307 |
| AC092821.4 | 0.25864753 | 0.003181267 | 0.096197956 | 0.32357612 | 0.22956368 |
| ADGRE3 | 0.25773445 | 0.002594479 | 0.081543954 | 0.181897 | 0.10920085 |
| PSMC4 | 0.25766283 | 0.010121176 | 0.198765519 | 0.36552656 | 0.27674913 |
| CMIP | 0.25697735 | 0.004125035 | 0.112485053 | 0.32244122 | 0.23044609 |
| S1PR5 | 0.25406927 | 0.000702809 | 0.031617779 | 1.3679416 | 1.2235123 |
| ACAA2 | 0.25162265 | 0.002993143 | 0.092032581 | 0.39708257 | 0.29338628 |
| OASL | 0.25103632 | 9.11E-05 | 0.005992235 | 0.23130718 | 0.1350752 |
| TUBA4A | -0.250934 | 0.001102642 | 0.044256035 | 0.41259545 | 0.53051734 |
| MMP25 | -0.25179657 | 2.85E-07 | 3.31E-05 | 0.105333336 | 0.20332117 |
| SLC44A2 | -0.25270528 | 0.008508736 | 0.179308674 | 0.46784458 | 0.57374203 |
| KMT2C | -0.25302133 | 0.000521876 | 0.025010533 | 0.29829544 | 0.40572727 |
| TRRAP | -0.25350592 | 6.13E-06 | 0.000546289 | 0.10715782 | 0.19741319 |
| APOBR | -0.2542497 | 0.011553851 | 0.216619954 | 0.25313693 | 0.3318552 |
| MACF1 | -0.25447023 | 0.006394008 | 0.148007667 | 0.82276034 | 0.96074945 |
| RPS6 | -0.25488374 | 2.42E-10 | 3.93E-08 | 2.3856082 | 2.6345205 |
| EIF3H | -0.2548917 | 0.000717678 | 0.032051054 | 0.6192074 | 0.76594377 |
| RPL23A | -0.25612018 | 3.43E-12 | 6.78E-10 | 2.6413147 | 2.8617046 |
| CSF2RB | -0.25767145 | 1.22E-06 | 0.000129087 | 0.083527796 | 0.17035057 |
| RPL31 | -0.26012242 | 1.02E-13 | 2.26E-11 | 3.058858 | 3.3019867 |
| RPL36 | -0.26093695 | 2.50E-08 | 3.25E-06 | 2.4504719 | 2.667887 |
| RPL37A | -0.26365897 | 9.30E-10 | 1.47E-07 | 2.5025656 | 2.7480886 |
| RAC2 | -0.26388386 | 4.00E-07 | 4.53E-05 | 1.895643 | 2.121327 |
| FUS | -0.26509905 | 0.000192011 | 0.011117845 | 0.7784472 | 0.9539308 |
| RPS3 | -0.266969 | 6.80E-12 | 1.30E-09 | 2.8052542 | 3.0265303 |
| UQCRH | -0.26775345 | 0.000512436 | 0.024622421 | 0.65614176 | 0.8122991 |
| SNHG25 | -0.26822555 | 8.49E-06 | 0.0007356 | 0.3769546 | 0.5287261 |
| CXCR4 | -0.26947373 | 2.53E-06 | 0.000253509 | 0.27765632 | 0.41328588 |
| FIS1 | -0.2705249 | 0.001798085 | 0.063468957 | 0.44592762 | 0.56762165 |
| C1orf52 | -0.27140453 | 2.02E-05 | 0.001614469 | 0.108544044 | 0.19734135 |
| RPL24 | -0.27173012 | 5.31E-06 | 0.000482865 | 1.5414693 | 1.770017 |
| RPL10 | -0.27285537 | 3.28E-10 | 5.28E-08 | 2.4639442 | 2.7120655 |
| LYZ | -0.27464065 | 8.60E-06 | 0.000741414 | 0.63397795 | 0.8237391 |
| CHCHD3 | -0.2762631 | 4.90E-07 | 5.45E-05 | 1.1289718 | 1.3775433 |
| PECAM1 | -0.2773454 | 1.40E-08 | 1.89E-06 | 0.14834926 | 0.27445498 |
| GRK2 | -0.27787292 | 0.000633878 | 0.029014552 | 0.5771824 | 0.72272944 |
| HENMT1 | -0.27825567 | 3.46E-05 | 0.002612731 | 0.15040067 | 0.2459538 |
| CXCR2 | -0.2784402 | 0.000493752 | 0.024103232 | 0.30974925 | 0.4221528 |
| SLC35F1 | -0.2808993 | 5.25E-06 | 0.000479773 | 0.74327415 | 0.9598341 |
| NAMPT | -0.28345013 | 5.20E-05 | 0.003701832 | 0.29736993 | 0.42094514 |
| IL16 | -0.28360426 | 0.000212257 | 0.011987642 | 0.74120915 | 0.91266704 |
| BTG2 | -0.28388715 | 2.47E-06 | 0.000249018 | 0.22182384 | 0.34455523 |
| LAIR2 | -0.28429553 | 0.001442917 | 0.053940422 | 0.20700024 | 0.29203993 |
| RPL9 | -0.2846245 | 3.86E-06 | 0.000367181 | 0.45970914 | 0.6321581 |
| RPS23 | -0.2850054 | 1.10E-09 | 1.72E-07 | 1.9329617 | 2.2215214 |
| GLRX | -0.289366 | 0.000894299 | 0.037562604 | 0.58366406 | 0.7301605 |
| UBALD2 | -0.29011917 | 0.000383598 | 0.019450095 | 0.42066908 | 0.55713934 |
| EGR1 | -0.29259345 | 1.94E-20 | 7.93E-18 | 0.05417649 | 0.20071128 |
| FBL | -0.29430202 | 3.00E-06 | 0.000292479 | 0.32175434 | 0.46882513 |
| RPL35 | -0.29567596 | 2.38E-09 | 3.64E-07 | 2.046197 | 2.3024116 |
| RPL13A | -0.29912087 | 6.79E-15 | 1.78E-12 | 2.5628245 | 2.8161235 |
| GIMAP6 | -0.30069774 | 1.14E-05 | 0.000970758 | 0.4374784 | 0.60168576 |
| CPQ | -0.30198556 | 7.75E-07 | 8.42E-05 | 0.10496796 | 0.2077977 |
| TRGC1 | -0.30230957 | 0.000600351 | 0.02782687 | 0.5012296 | 0.6467166 |
| EIF3L | -0.30356097 | 0.000706532 | 0.031707561 | 0.2189347 | 0.31192556 |
| FKBP5 | -0.30570126 | 1.03E-06 | 0.000110481 | 0.16809301 | 0.28459722 |
| RPS24 | -0.3061364 | 2.85E-09 | 4.25E-07 | 1.8549412 | 2.1436386 |
| RPL12 | -0.30742905 | 1.26E-10 | 2.11E-08 | 1.7703646 | 2.0619113 |
| RPL41 | -0.30758455 | 6.13E-09 | 8.73E-07 | 1.3907518 | 1.6732014 |
| EEF1A1 | -0.3094861 | 7.38E-17 | 2.38E-14 | 2.5370095 | 2.8247533 |
| RPL32 | -0.31114927 | 1.43E-14 | 3.50E-12 | 2.515645 | 2.804452 |
| SNHG5 | -0.31225395 | 2.39E-05 | 0.001883918 | 0.4316177 | 0.59205 |
| RPS27 | -0.31263256 | 1.13E-32 | 1.10E-29 | 3.6838412 | 3.9883165 |
| RPS2 | -0.31386298 | 2.23E-16 | 6.59E-14 | 2.797198 | 3.0602188 |
| RPL3 | -0.31568196 | 4.80E-11 | 8.31E-09 | 1.4664357 | 1.7698038 |
| TUT7 | -0.31603956 | 5.79E-07 | 6.33E-05 | 0.28794736 | 0.4425548 |
| RPL7A | -0.3171168 | 2.71E-09 | 4.08E-07 | 1.5155177 | 1.7967309 |
| MT-ND2 | -0.31978568 | 3.23E-19 | 1.24E-16 | 3.1697104 | 3.399828 |
| JUNB | -0.32216153 | 5.98E-11 | 1.02E-08 | 1.0840521 | 1.4111476 |
| AL592183.1 | -0.32313752 | 4.56E-09 | 6.59E-07 | 0.14693417 | 0.28175938 |
| GOLGA8A | -0.3236719 | 1.42E-08 | 1.90E-06 | 0.16027965 | 0.29471165 |
| SNRPF | -0.32395655 | 1.75E-05 | 0.001429813 | 0.25463298 | 0.38716352 |
| MECOM | -0.3254669 | 5.64E-07 | 6.20E-05 | 0.9165484 | 1.1531115 |
| GCSAM | -0.33333635 | 1.53E-14 | 3.70E-12 | 0.05820746 | 0.186994 |
| RPL19 | -0.33348733 | 2.56E-17 | 8.70E-15 | 2.5138907 | 2.821426 |
| TAGAP | -0.33357498 | 8.07E-05 | 0.00538859 | 0.4507242 | 0.6050263 |
| RPL27 | -0.33446497 | 4.12E-09 | 6.00E-07 | 1.7911085 | 2.0792634 |
| PDZD4 | -0.33636174 | 2.40E-08 | 3.14E-06 | 0.122984394 | 0.24494039 |
| XAF1 | -0.33755365 | 0.000290213 | 0.01530705 | 0.5865451 | 0.7519106 |
| ZFPM1 | -0.34002697 | 3.76E-07 | 4.29E-05 | 0.11844948 | 0.23039463 |
| NBEAL1 | -0.34070775 | 4.06E-09 | 5.96E-07 | 0.924242 | 1.2034988 |
| ACTG1 | -0.34225017 | 7.12E-09 | 9.83E-07 | 1.9399058 | 2.2381163 |
| SNHG8 | -0.34300557 | 1.92E-05 | 0.001550319 | 0.33287022 | 0.48087496 |
| RPL35A | -0.3435826 | 1.23E-14 | 3.04E-12 | 2.0989466 | 2.4201062 |
| RPS27A | -0.3438452 | 4.26E-18 | 1.50E-15 | 2.5536468 | 2.8803864 |
| FCMR | -0.3459749 | 6.65E-09 | 9.32E-07 | 1.2179452 | 1.5024171 |
| MNDA | -0.34765312 | 1.93E-13 | 4.08E-11 | 0.45838454 | 0.7294857 |
| ZFP36 | -0.3493604 | 1.89E-07 | 2.28E-05 | 0.73288786 | 0.97165745 |
| BAIAP2L1 | -0.354137 | 6.07E-11 | 1.02E-08 | 0.76502556 | 1.0552384 |
| SPOCK2 | -0.3574001 | 1.28E-11 | 2.37E-09 | 0.4736227 | 0.7339113 |
| RPL27A | -0.3577374 | 1.03E-22 | 5.11E-20 | 2.9790478 | 3.2863188 |
| RPS11 | -0.36411598 | 7.70E-15 | 1.99E-12 | 2.0162604 | 2.3522236 |
| UBA52 | -0.36679992 | 3.13E-13 | 6.39E-11 | 1.9053872 | 2.254721 |
| MX1 | -0.36726344 | 7.36E-05 | 0.004988031 | 0.098305576 | 0.19131662 |
| RPS4X | -0.36785707 | 1.37E-10 | 2.24E-08 | 1.4592663 | 1.7850554 |
| FPR1 | -0.36786282 | 1.59E-13 | 3.39E-11 | 0.20297144 | 0.39195928 |
| OOEP | -0.3793176 | 8.82E-14 | 1.98E-11 | 1.7461396 | 2.0718553 |
| RPLP2 | -0.3815657 | 7.67E-31 | 6.70E-28 | 3.3289242 | 3.627113 |
| PHC2 | -0.38250756 | 1.82E-08 | 2.42E-06 | 0.13779259 | 0.2717604 |
| DAB1 | -0.38354284 | 1.32E-12 | 2.65E-10 | 0.09674447 | 0.24287422 |
| CORO1A | -0.38505536 | 2.41E-11 | 4.25E-09 | 1.2018557 | 1.5243435 |
| RPS16 | -0.38909507 | 3.00E-16 | 8.60E-14 | 2.2332923 | 2.564896 |
| RPL39 | -0.39308316 | 4.13E-18 | 1.49E-15 | 1.9028605 | 2.291217 |
| RPS3A | -0.39404744 | 4.43E-17 | 1.48E-14 | 1.8208184 | 2.2015555 |
| RPL28 | -0.39487606 | 8.92E-15 | 2.27E-12 | 1.9036984 | 2.2462156 |
| RPL23 | -0.39735663 | 2.79E-14 | 6.56E-12 | 1.7150608 | 2.084434 |
| RPS29 | -0.426036 | 1.13E-38 | 2.60E-35 | 3.4863994 | 3.7856588 |
| DENND2D | -0.42835686 | 1.04E-13 | 2.28E-11 | 0.6600938 | 0.99185085 |
| MT-ND1 | -0.42854044 | 1.95E-27 | 1.38E-24 | 2.7645187 | 3.1396585 |
| EEF1B2 | -0.43604997 | 1.36E-11 | 2.48E-09 | 1.1421409 | 1.4752772 |
| JUND | -0.43871686 | 3.09E-15 | 8.21E-13 | 0.539198 | 0.85976803 |
| RPS8 | -0.4435938 | 6.30E-16 | 1.78E-13 | 1.5781915 | 1.9724834 |
| DUSP1 | -0.44985992 | 3.56E-20 | 1.42E-17 | 0.6829847 | 1.0975773 |
| RPL37 | -0.45602262 | 1.20E-29 | 1.00E-26 | 2.6911035 | 3.1151476 |
| CMTM2 | -0.45763242 | 1.14E-14 | 2.88E-12 | 0.103752 | 0.26909 |
| RPL30 | -0.4605065 | 1.14E-27 | 8.36E-25 | 2.5433555 | 2.9460566 |
| AL136454.1 | -0.46332374 | 1.83E-21 | 8.01E-19 | 1.1436523 | 1.5762995 |
| RPL4 | -0.46412876 | 1.40E-15 | 3.78E-13 | 1.1580621 | 1.5564305 |
| RPS15A | -0.46507823 | 1.10E-16 | 3.42E-14 | 1.587357 | 1.9689559 |
| RPS20 | -0.47014457 | 2.84E-25 | 1.68E-22 | 2.0566185 | 2.5005462 |
| RPS21 | -0.4811314 | 3.79E-18 | 1.39E-15 | 1.9344693 | 2.3252566 |
| S100A8 | -0.4864633 | 1.64E-14 | 3.91E-12 | 1.6583755 | 2.0823066 |
| RPL38 | -0.4903333 | 1.55E-24 | 8.12E-22 | 1.8714982 | 2.2987216 |
| CD5 | -0.50203335 | 4.25E-14 | 9.87E-12 | 0.08486896 | 0.24997006 |
| HLA-DQA1 | -0.5022197 | 1.57E-22 | 7.61E-20 | 0.098128796 | 0.31167403 |
| HLA-DQB1 | -0.5065298 | 5.89E-17 | 1.93E-14 | 0.11089238 | 0.30775058 |
| MT-ND3 | -0.50740206 | 3.39E-35 | 4.80E-32 | 2.6041934 | 3.061777 |
| TRGV8 | -0.51465523 | 1.06E-15 | 2.90E-13 | 0.079322875 | 0.2472551 |
| NFKBIA | -0.526663 | 7.06E-20 | 2.76E-17 | 0.646252 | 1.0672528 |
| RPS12 | -0.5345379 | 1.79E-26 | 1.17E-23 | 1.9757799 | 2.4595053 |
| RPS25 | -0.5366784 | 1.77E-25 | 1.08E-22 | 1.4901258 | 1.9798684 |
| RPS28 | -0.54841036 | 1.44E-28 | 1.10E-25 | 1.6265424 | 2.1205034 |
| FOS | -0.5611899 | 1.04E-24 | 5.61E-22 | 0.40413576 | 0.7967247 |
| TPT1 | -0.5906995 | 1.53E-20 | 6.37E-18 | 1.6991148 | 2.168551 |
| RGS2 | -0.600699 | 2.50E-16 | 7.28E-14 | 0.25664198 | 0.5166865 |
| PLEKHA7 | -0.6051175 | 2.57E-22 | 1.20E-19 | 1.2182893 | 1.7027544 |
| AC138123.1 | -0.61425453 | 2.85E-22 | 1.27E-19 | 0.55818564 | 0.96425474 |
| HLA-DQA2 | -0.6166925 | 3.94E-33 | 4.02E-30 | 0.016371822 | 0.21198453 |
| GNAS | -0.6518924 | 2.22E-26 | 1.41E-23 | 0.853407 | 1.3804226 |
| RPSA | -0.68123466 | 2.61E-22 | 1.20E-19 | 0.8678584 | 1.3227292 |
| FCRL3 | -0.7242103 | 6.45E-24 | 3.29E-21 | 0.22849575 | 0.554664 |
| S100A9 | -0.72537595 | 1.77E-43 | 5.41E-40 | 1.5424626 | 2.2776835 |
| G0S2 | -0.7352036 | 3.40E-35 | 4.80E-32 | 0.28262913 | 0.7108873 |
| CD160 | -0.74015856 | 9.12E-17 | 2.89E-14 | 0.31350735 | 0.625653 |
| IL32 | -0.7431226 | 2.37E-54 | 8.69E-51 | 2.1184537 | 2.7924852 |
| TRAC | -0.8151565 | 6.41E-31 | 5.88E-28 | 0.8613314 | 1.4575866 |
| CD3G | -0.8289871 | 2.24E-27 | 1.52E-24 | 0.44911724 | 0.93210214 |
| CD8A | -0.83128285 | 3.03E-25 | 1.74E-22 | 0.4422264 | 0.90687597 |
| KLRG1 | -0.83918196 | 6.27E-34 | 6.77E-31 | 0.48186848 | 1.0187631 |
| CD8B | -0.8396023 | 1.76E-16 | 5.29E-14 | 0.3383078 | 0.6876447 |
| CXCL8 | -0.8948748 | 3.30E-41 | 8.66E-38 | 0.2919866 | 0.77857494 |
| CD3D | -0.98172945 | 1.32E-34 | 1.51E-31 | 0.8953647 | 1.6720513 |
| TRBV10-2 | -1.1674751 | 1.03E-34 | 1.26E-31 | 0 | 0.24388683 |
| TRDV1 | -1.175132 | 4.90E-35 | 6.43E-32 | 0.10203122 | 0.48381007 |
| TRBV9 | -1.3773911 | 3.27E-37 | 6.67E-34 | 0.006983207 | 0.30041236 |

**Supplementary Table 5** BEAM analyze relevant genes in CD8+ Effector T cells.

|  | gene_id | Cluster |
| --- | --- | --- |
| 1 | GZMK | 1 |
| 2 | HBB | 1 |
| 3 | GNLY | 1 |
| 4 | TRBV6-2 | 1 |
| 5 | HBA2 | 1 |
| 6 | TRAV21 | 1 |
| 7 | HBA1 | 1 |
| 8 | ZNF683 | 1 |
| 9 | CMC1 | 1 |
| 10 | CD74 | 1 |
| 11 | GZMB | 1 |
| 12 | CD160 | 1 |
| 13 | FGFBP2 | 1 |
| 14 | MYOM2 | 1 |
| 15 | CXCR6 | 1 |
| 16 | TRBV5-1 | 1 |
| 17 | CCL4L2 | 1 |
| 18 | GPR183 | 1 |
| 19 | TIGIT | 1 |
| 20 | CCR5 | 1 |
| 21 | CCL5 | 1 |
| 22 | CD52 | 1 |
| 23 | ITGB1 | 1 |
| 24 | CHI3L2 | 1 |
| 25 | COTL1 | 1 |
| 26 | AC243829.1 | 1 |
| 27 | KLRB1 | 1 |
| 28 | PRSS23 | 1 |
| 29 | TSC22D3 | 1 |
| 30 | HLA-DRA | 1 |
| 31 | TRBV6-8 | 1 |
| 32 | GZMH | 1 |
| 33 | PCNT | 1 |
| 34 | EOMES | 1 |
| 35 | XCL2 | 1 |
| 36 | HLA-B | 1 |
| 37 | DRAIC | 1 |
| 38 | SPON2 | 1 |
| 39 | GPR174 | 1 |
| 40 | HLA-DRB1 | 1 |
| 41 | TRGC1 | 1 |
| 42 | CCL3L3 | 1 |
| 43 | TRAC | 1 |
| 44 | TRBV27 | 1 |
| 45 | CCL4 | 1 |
| 46 | CRTAM | 1 |
| 47 | PRF1 | 1 |
| 48 | HLA-DRB5 | 1 |
| 49 | PRSS57 | 1 |
| 50 | IGHG1 | 1 |
| 51 | ASCL2 | 1 |
| 52 | EFHD2 | 1 |
| 53 | LGALS1 | 1 |
| 54 | DUSP2 | 1 |
| 55 | ID2 | 1 |
| 56 | S100A4 | 1 |
| 57 | CXCL8 | 1 |
| 58 | TRBV12-3 | 1 |
| 59 | ITGAM | 1 |
| 60 | AOAH | 1 |
| 61 | PDLIM1 | 1 |
| 62 | CD5 | 1 |
| 63 | XCL1 | 1 |
| 64 | LAIR2 | 1 |
| 65 | TRAV8-1 | 1 |
| 66 | TRAV19 | 1 |
| 67 | TRBC2 | 1 |
| 68 | IFITM2 | 1 |
| 69 | LYST | 1 |
| 70 | TRBV7-3 | 1 |
| 71 | SLAMF7 | 1 |
| 72 | PTPN6 | 1 |
| 73 | ITGA5 | 1 |
| 74 | TXNIP | 1 |
| 75 | NCR1 | 1 |
| 76 | IGKV2-29 | 1 |
| 77 | FXYD5 | 1 |
| 78 | FCRL3 | 1 |
| 79 | STAT1 | 1 |
| 80 | TRBV25-1 | 1 |
| 81 | PLEKHG3 | 1 |
| 82 | S100A10 | 1 |
| 83 | RASGEF1A | 1 |
| 84 | TRAV38-2DV8 | 1 |
| 85 | TRDC | 1 |
| 86 | ADGRG1 | 1 |
| 87 | ACTB | 1 |
| 88 | PDCD4 | 1 |
| 89 | TRAV8-4 | 1 |
| 90 | TRBV6-6 | 1 |
| 91 | G0S2 | 1 |
| 92 | IKZF3 | 1 |
| 93 | AC243829.2 | 1 |
| 94 | IGHG4 | 1 |
| 95 | PLCG2 | 1 |
| 96 | ARPC5L | 1 |
| 97 | SOX13 | 1 |
| 98 | P2RY11 | 1 |
| 99 | TRAT1 | 1 |
| 100 | TRBV2 | 1 |
| 101 | CAPG | 1 |
| 102 | UTS2 | 1 |
| 103 | CNR2 | 1 |
| 104 | GZMM | 1 |
| 105 | HLA-C | 1 |
| 106 | DTHD1 | 1 |
| 107 | CALR | 1 |
| 108 | GIMAP4 | 1 |
| 109 | TRBV20-1 | 1 |
| 110 | TRBV19 | 1 |
| 111 | ABCD1 | 1 |
| 112 | CD320 | 1 |
| 113 | CXCR3 | 1 |
| 114 | AKR1C3 | 1 |
| 115 | CMKLR1 | 1 |
| 116 | LINC00299 | 1 |
| 117 | KLRG1 | 1 |
| 118 | CDKN2A | 1 |
| 119 | GRK6 | 1 |
| 120 | TNFAIP3 | 1 |
| 121 | ATP10A | 1 |
| 122 | AL450352.1 | 1 |
| 123 | NIN | 1 |
| 124 | PLAC8 | 1 |
| 125 | S100A6 | 1 |
| 126 | RAB27A | 1 |
| 127 | TRBV7-2 | 1 |
| 128 | ACTG1 | 1 |
| 129 | GBP1 | 1 |
| 130 | CAST | 1 |
| 131 | BCL2L11 | 1 |
| 132 | LINC02384 | 1 |
| 133 | CD6 | 1 |
| 134 | AF165147.1 | 1 |
| 135 | TRBV6-5 | 1 |
| 136 | PRNP | 1 |
| 137 | RGS9 | 1 |
| 138 | PROK2 | 1 |
| 139 | KRAS | 1 |
| 140 | KLF3 | 1 |
| 141 | LDB2 | 1 |
| 142 | CACNA2D2 | 1 |
| 143 | TCF7 | 2 |
| 144 | SIRPG | 2 |
| 145 | GCSAM | 2 |
| 146 | CD8B | 2 |
| 147 | CD27 | 2 |
| 148 | PECAM1 | 2 |
| 149 | IL7R | 2 |
| 150 | LTB | 2 |
| 151 | TTN | 2 |
| 152 | RASAL2 | 2 |
| 153 | RGL4 | 2 |
| 154 | DENND2D | 2 |
| 155 | SLC35F1 | 2 |
| 156 | STK17A | 2 |
| 157 | TSPYL2 | 2 |
| 158 | CD28 | 2 |
| 159 | DBN1 | 2 |
| 160 | AMBRA1 | 2 |
| 161 | CD7 | 2 |
| 162 | C1orf162 | 2 |
| 163 | HIVEP2 | 2 |
| 164 | FKBP5 | 2 |
| 165 | SNHG5 | 2 |
| 166 | PDE3B | 2 |
| 167 | NUCB2 | 2 |
| 168 | CD200R1 | 2 |
| 169 | AC127521.1 | 2 |
| 170 | CNN2 | 2 |
| 171 | PGGHG | 2 |
| 172 | ACAP1 | 2 |
| 173 | TRAV20 | 2 |
| 174 | BTG1 | 2 |
| 175 | TTC24 | 2 |
| 176 | CPNE2 | 2 |
| 177 | PIGP | 2 |
| 178 | FYB1 | 2 |
| 179 | IL16 | 2 |
| 180 | ZNF101 | 2 |
